# Supplementary material for: LTRs activated by Epstein-Barr virus–induced transformation of B cells alter the transcriptome
Source: HighWire-hosted journal article supplement (doi:10.1101/gr.233585.117), 2018-10-31
Supplement: Supplemental_Figures_S1_S13_final.pdf [file Supplemental_Figures_S1_S13_final.pdf]

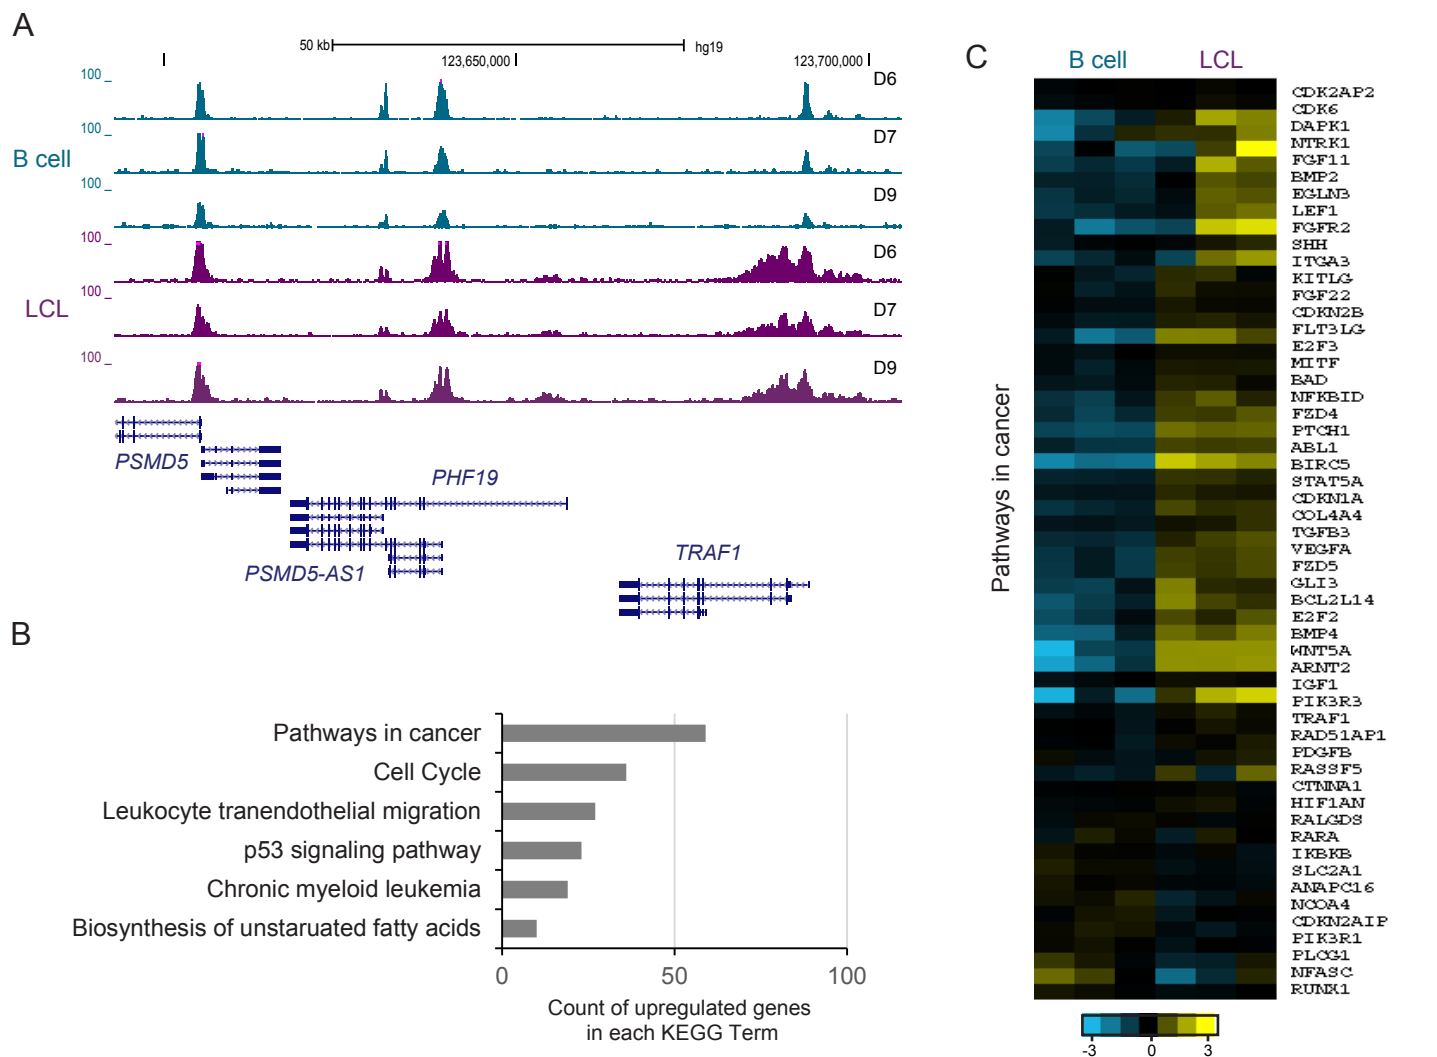

**Figure S1: EBV-induced changes at genes.** (A) Genome browser track of H3K4me3 profiles at *PHF19-TRAF1* and adjacent locus. (Blue box; TSS with decreased H3K4me3 enrichment in LCL, yellow box; TSS with increased H3K4me3 enrichment in LCL.) (B) Number of upregulated genes found in each KEGG term (DAVID;  $P < 0.05$ ) (C) Heatmap of normalized read counts at each gene in B cell and LCL for genes in the "Pathway in cancer" KEGG term classification.

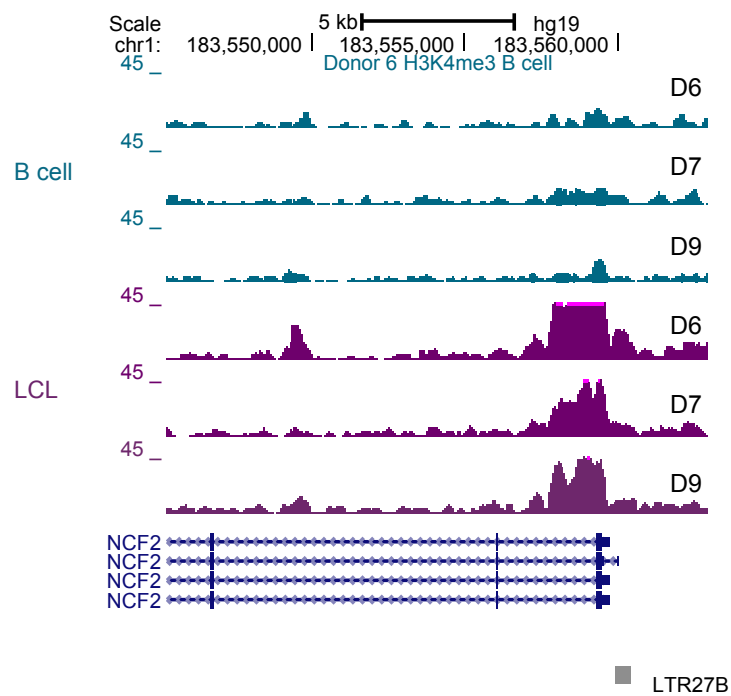

**Figure S2: Example of protein-coding gene, *NCF2*, with alternative LTR-driven transcript.**  
Genome browser tracks of H3K4me3 profiles at the *NCF2* locus.

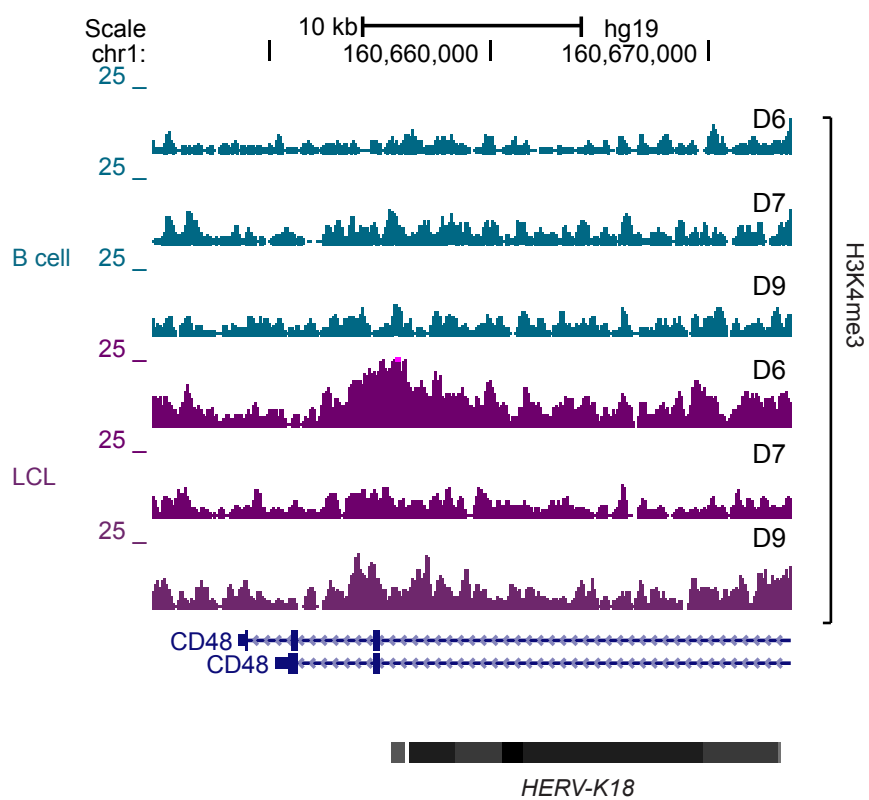

**Figure S3: H3K4me3 profile at *HERV-K18* found within *CD48* locus.** Genome browser tracks of H3K4me3 profiles at the *HERV-K18* locus which is found within the *CD48* locus.

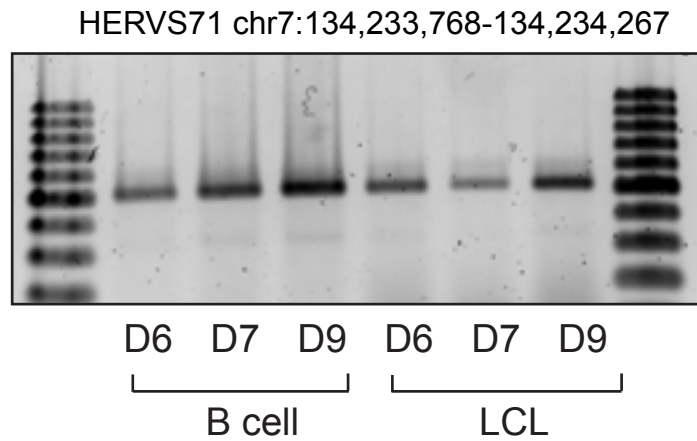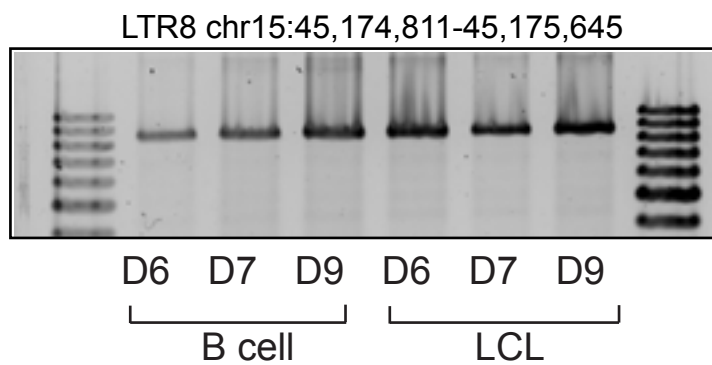

**Figure S4: Activated LTRs do not show obvious rearrangements in LCLs.** PCR of two LTRs from genomic DNA isolated from B cells and LCLs

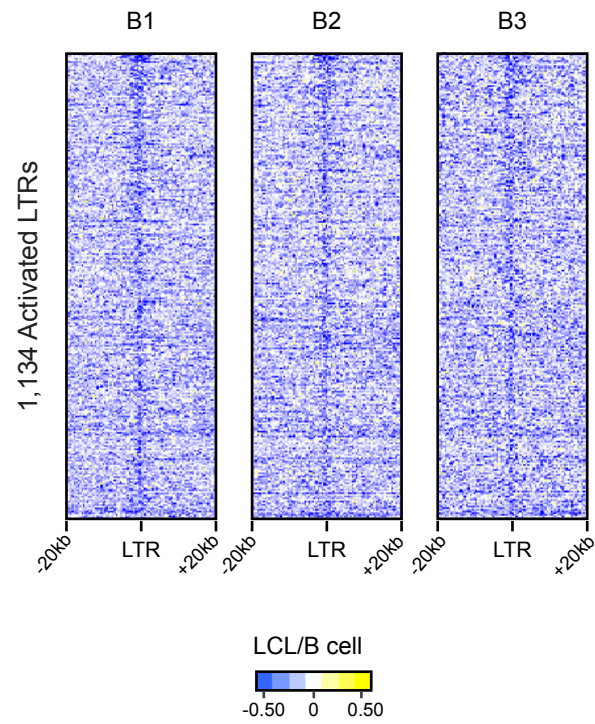

**Figure S5: Hypomethylation of activated LTRs occurs locally.** Shown are 500bp bins of average CpG methylation in the +/- 20kb region surround the 1,134 activated LTRs. Data from GSE49629.

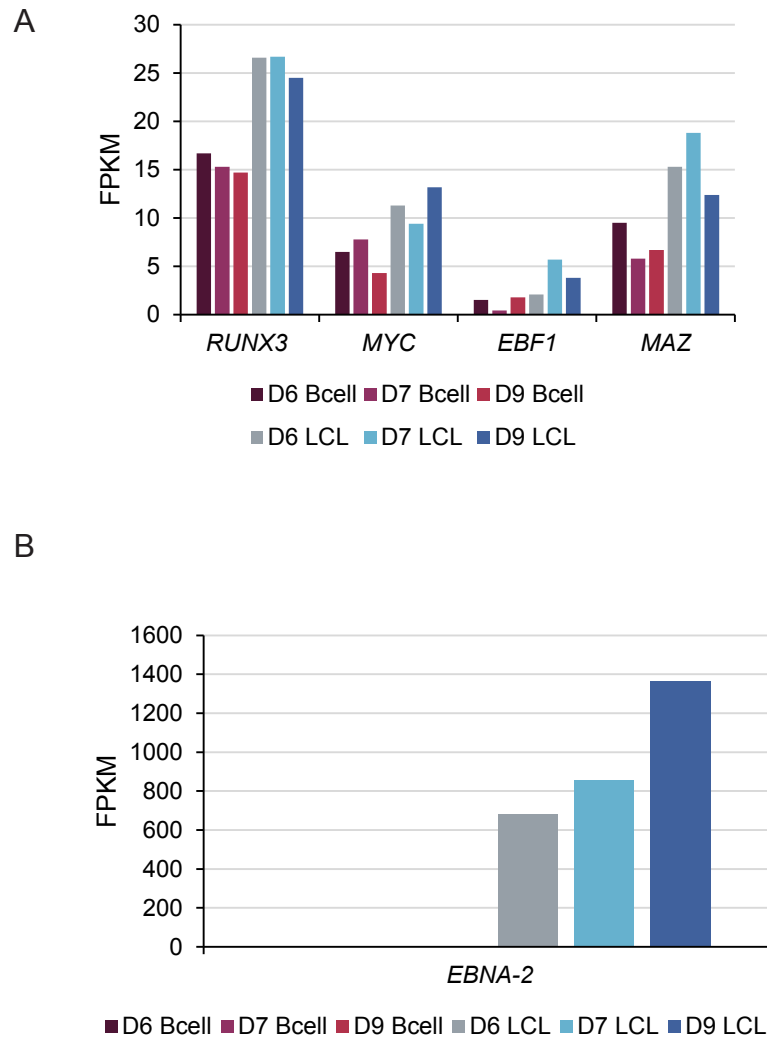

**Figure S6: Expression of transcription factors in B cells and LCLs.** Shown are FPKM for (A) cellular transcription factors and (B) *EBNA-2*, viral encoded transcription factor in B cells and LCLs.

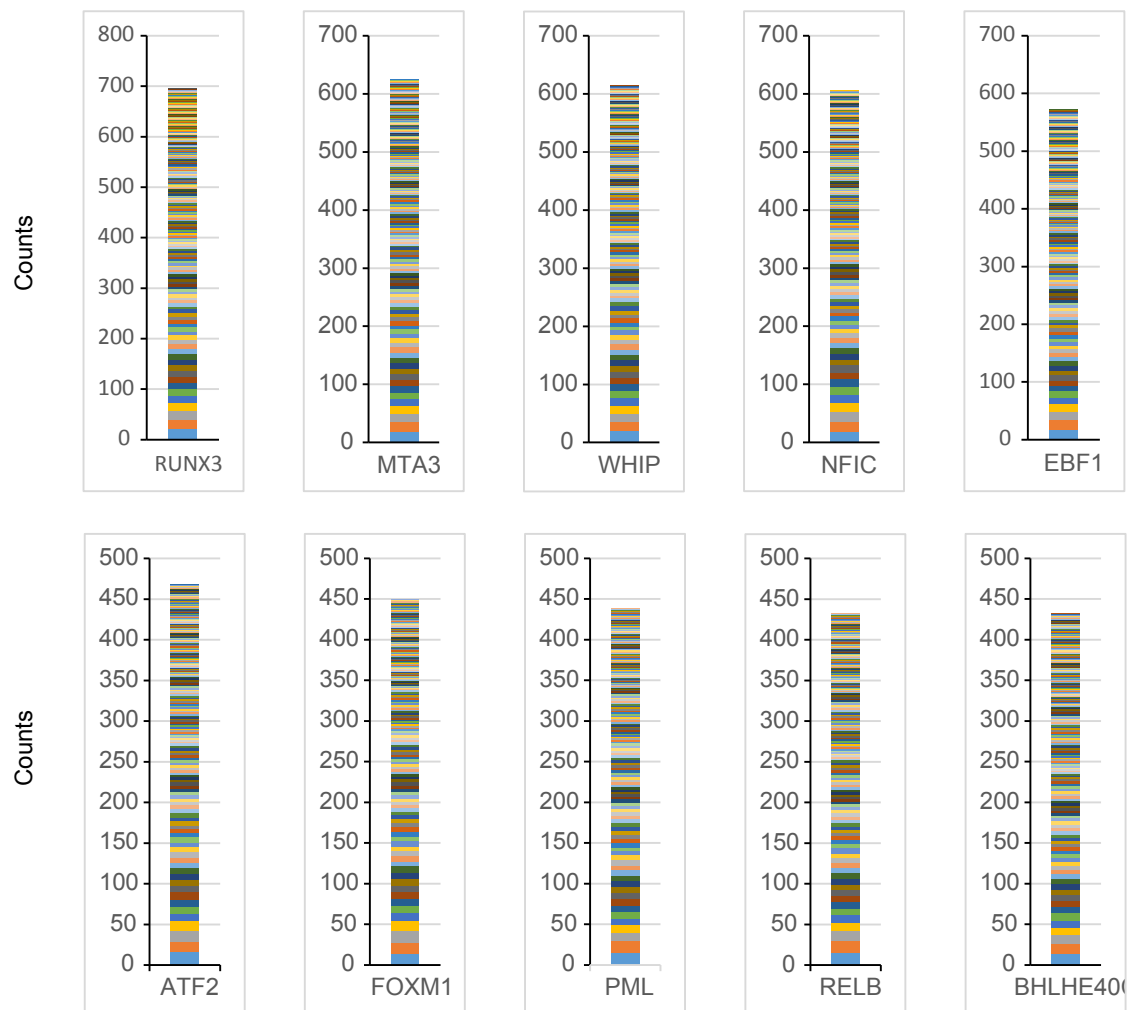

**Figure S7: LTR subfamilies bound by specific transcription factors are highly variable.** Shown are the counts of LTR subfamilies. Each color is a different subfamily (see Supplemental Table S for exact counts for each subfamily)

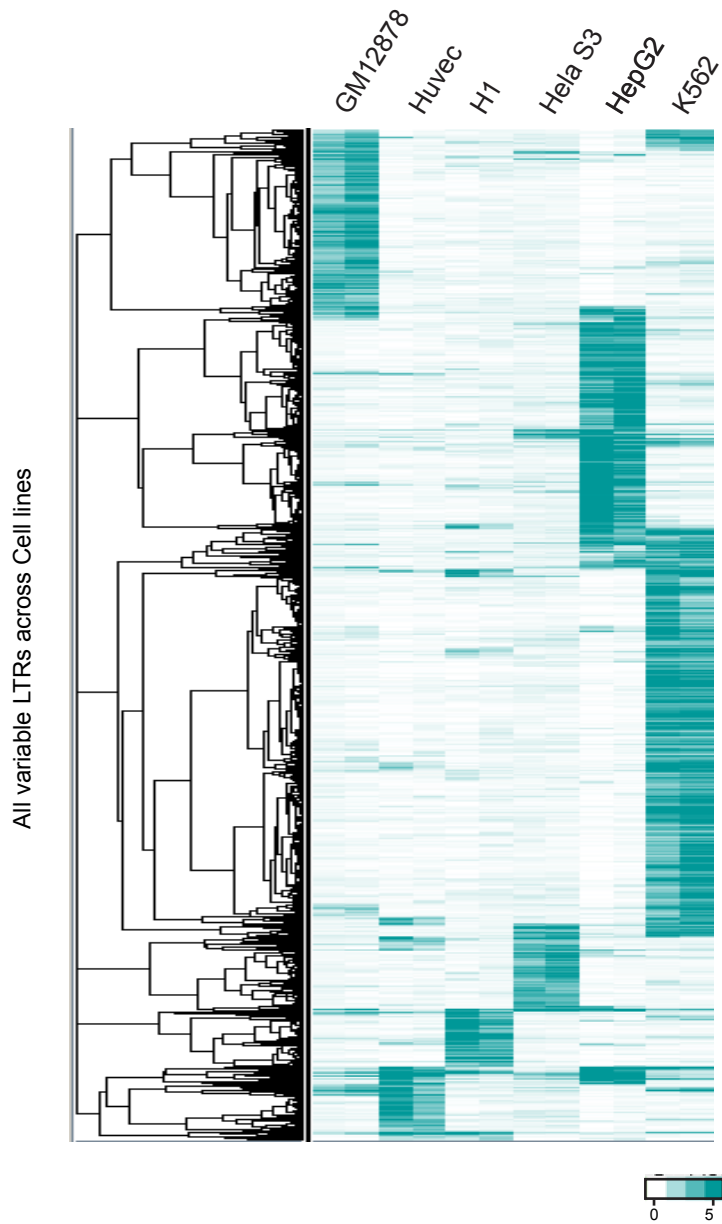

**Figure S8: Variable LTR activity in ENCODE cell lines.** Heatmap of normalized H3K4me3 levels across ENCODE cell lines. Hierarchical clustering was performed across LTRs that are differentially enriched for H3K4me3.



1,134 Activated LTRs

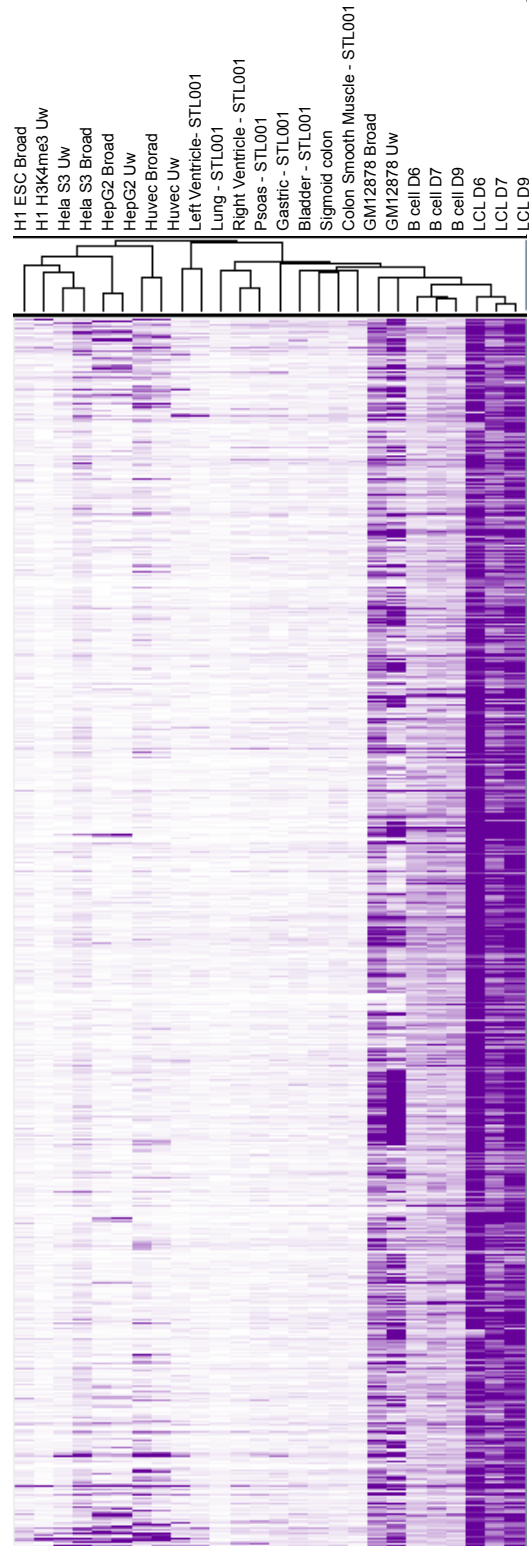

**Figure S9: Variable LTR activity in ENCODE cell lines and Roadmap data.** Heatmap of H3K4me3 counts across activated LTRs in ENCODE cell lines, Roadmap data, and our B cell and LCL datasets. Hierarchical clustering was performed across LTRs that are differentially enriched for H3K4me3.

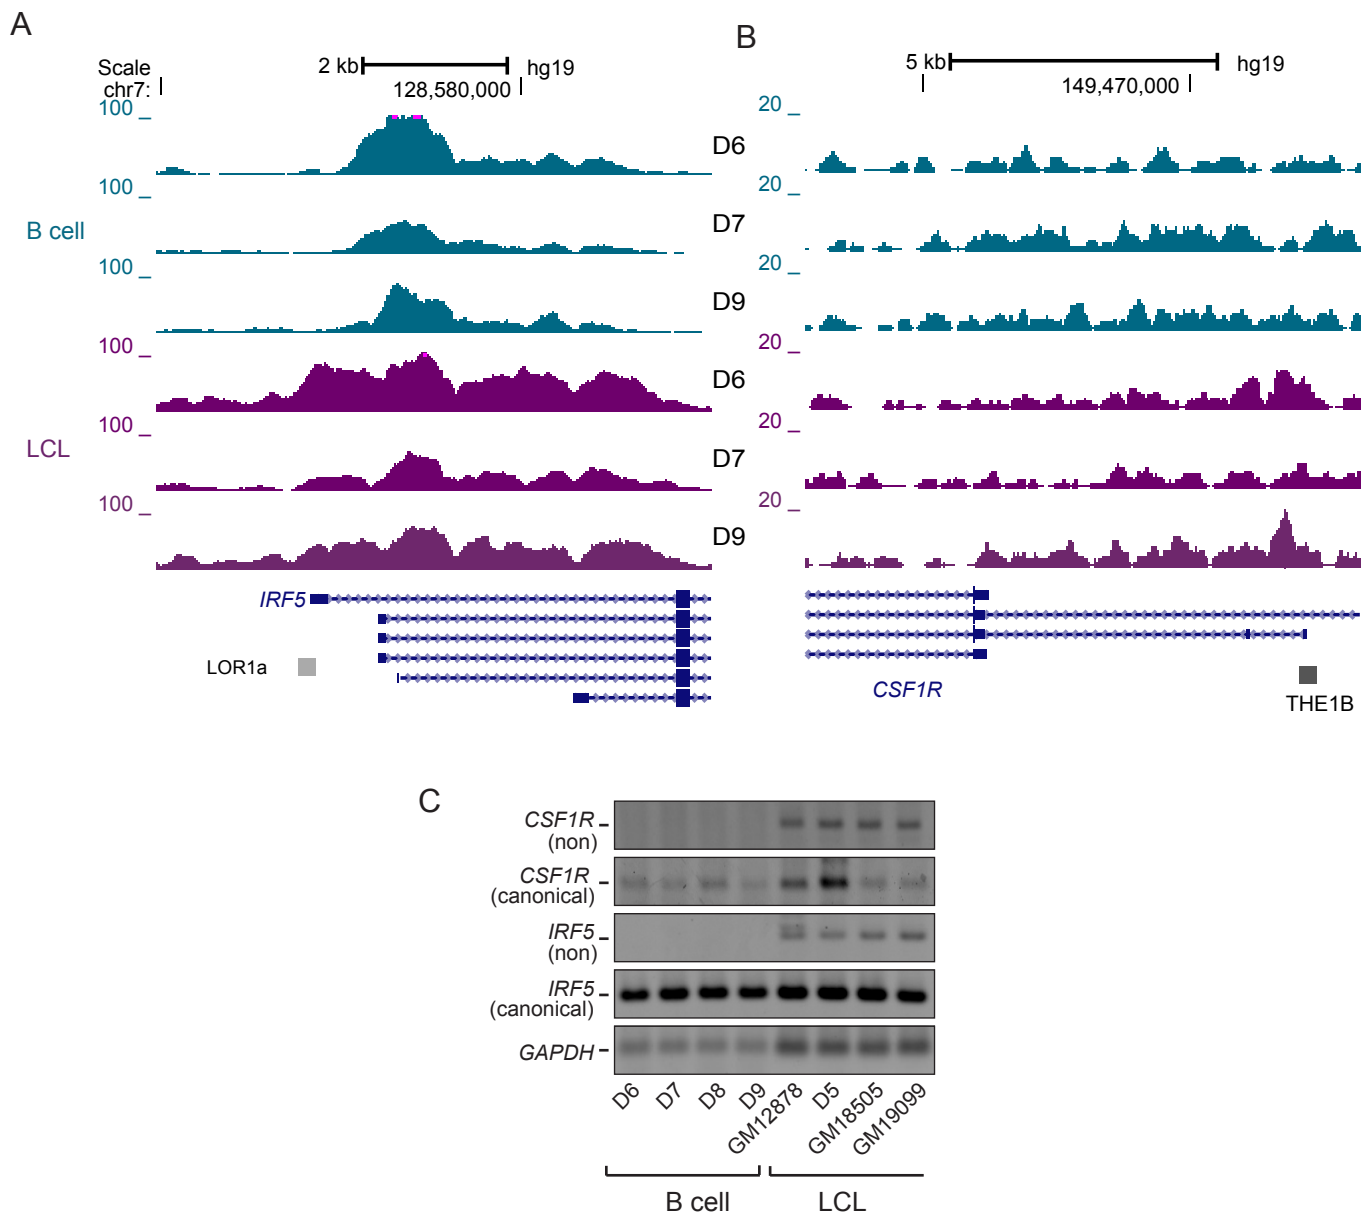

**Figure S10: Non-canonical LTR-driven transcripts of *CSF1R* and *IRF5* are expressed in EBV-transformed B cells.** Genome browser tracks of (A) *IRF5* and (B) *CSF1R* locus with H3K4me3 profiles. (C). RT-PCR analyzing expression of canonical and non-canonical transcripts in B cells and LCLs.

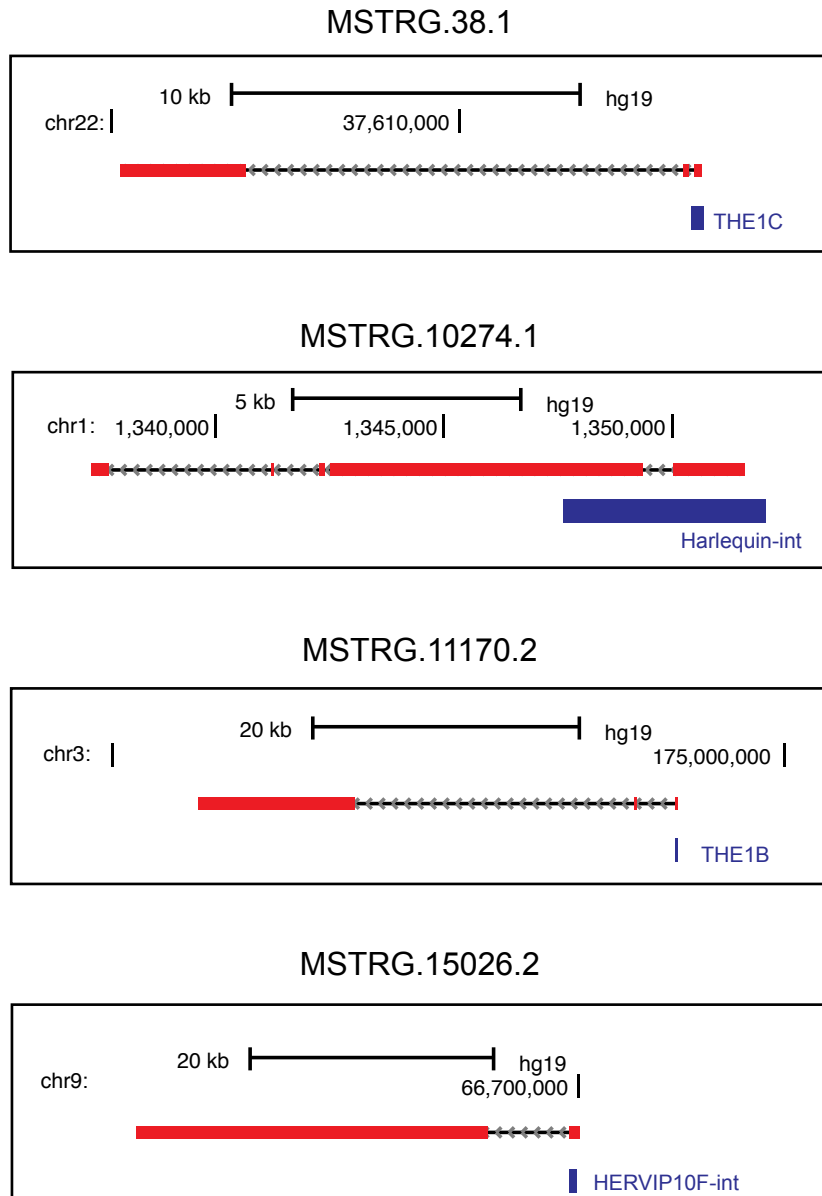

**Figure S11: Schematic of transcript structures for novel LTR-driven transcripts.** Shown are transcript structures (red) annotated from RNA-seq data from donor B cells and LCLs. Shown in blue are the positions of LTRs

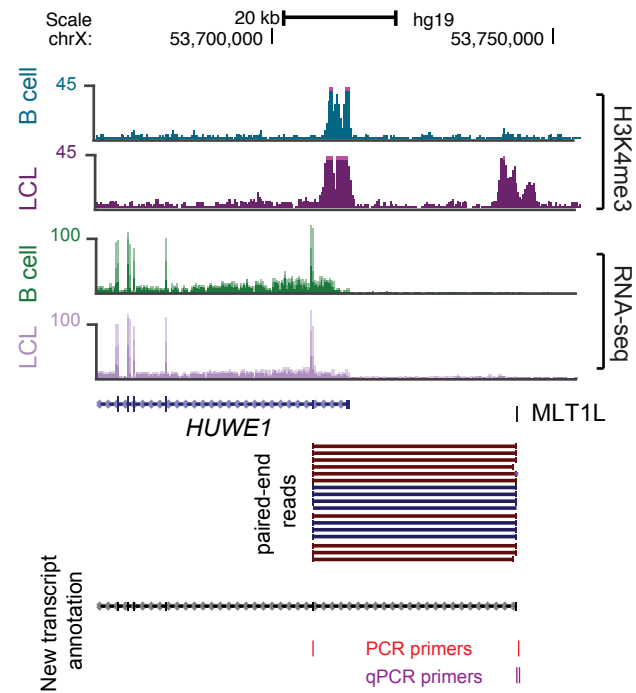

**Figure S12: Expanded genome browser tracks of *HUWE1* locus.** See Figure 5A legend.

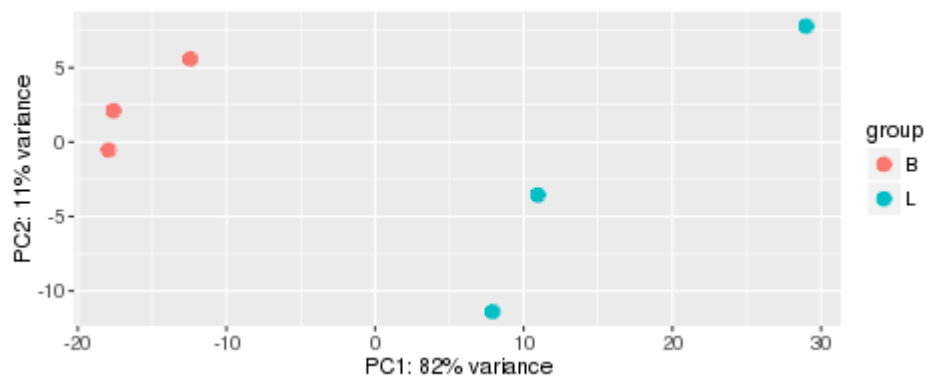

**Figure S13: Principal component analysis of ChIP-seq data from DESeq2 normalized read counts at H3K4me3 sites showing PC1 and PC2.**
