# Supplementary material for: LTRs activated by Epstein-Barr virus–induced transformation of B cells alter the transcriptome
Source: HighWire-hosted journal article supplement (doi:10.1101/gr.233585.117), 2018-10-31
Supplement: Supplemental_Materials_final.docx [file Supplemental_Materials_final.docx]

**SUPPLEMENTAL MATERIALS**

**LTRs activated by Epstein-Barr virus-induced transformation of B cells alter the transcriptome**

***Leung et. al.***

**TABLE of CONTENTS**

**FIGURES**

Figure S1: EBV-induced changes at genes

Figure S2: Example of protein-coding gene

Figure S3: H3K4me3 profile at *HERV-K18* found within *CD48* locus

Figure S4: Activated LTRs do not show obvious rearrangements in LCLs

Figure S5: Hypomethylation of activated LTRs occurs locally

Figure S6: Expression of transcription factors in B cells and LCLs

Figure S7: LTR subfamilies bound by specific transcription factors are highly variable

Figure S8: Variable LTR activity in ENCODE cell lines

Figure S9: Variable LTR activity in ENCODE cell lines and Roadmap data

Figure S10: Non-canonical LTR-drive transcripts of *CSF1R* and *IRF5* are expression in EBV-transformed cells

Figure S11: Schematic of transcript structures for novel LTR-driven transcripts

Figure S12: Expanded genome browser tracks of *HUWE1* locus

Figure S13: Principal component analysis of ChIP-seq data from DESeq2 normalized read

counts at H3K4me3 sites showing PC1 and PC2.

**TABLES (additional Excel files)**

Table S1: Frequency of LTR subfamilies in 1,134 activated LTRs

Table S2: LTR subfamilies bound by top 10 transcription factors

Table S3: Upregulated LTR-driven transcripts, FPKM>1

Table S4: Summary of sequencing datasets

Table S5: Primers used in this study

**CODE**

Supplemental_Code.tar.gz

**SUPPLEMENTAL METHODS**

**Chromatin immunoprecipitation (ChIP) sequencing**

In B cells and LCLs from donors, ChIPs were carried out with anti-H3K4me3 antibody (Abcam, ab8580) using standard ChIP protocols. Sequencing libraries were generated using the Kapa Hyper Prep kit (Kapa Biosystems) and sequenced using Illumina HiSeq 2500 technology. We obtained on average ~65M 100bp x 100bp paired-end reads per H3K4me3 library ~21M 100bp x 100bp paired-end reads per input library (H3K4me3, **Supplemental Table S4**). Sequences were aligned to the hg19 reference genome using Bowtie ([Langmead 2010](#_ENREF_11)) with default options, except only uniquely mapped reads were retained (-m 1 option). BEDtools ([Quinlan and Hall 2010](#_ENREF_14); [Quinlan 2014](#_ENREF_13)) was used to generate wiggle tracks which were visualized in the UCSC Genome Browser. Peaks of H3K4me3 were analyzed using MACS ([Zhang et al. 2008](#_ENREF_18)). To identify H3K4me3 differentially enriched at genes, counts at peaks overlapping Refseq transcriptional start sites were analyzed using comparing B cells to LCLs ([Love et al. 2014](#_ENREF_12)). To identify H3K4me3 differentially enriched LTRs, all LTR loci (RepeatMasker Open-4.0) ([Smit et al. 2013-2015](#_ENREF_16)) overlapping peaks were obtained and counts of H3K4me3 reads were analyzed using DESeq2. For example of commands, see **Supplemental Methods**.

For gene ontology analysis, differentially enriched H3K4me3 peaks at transcriptional start sites (Refseq annotation, hg19) were analyzed. Genes with the transcriptional start sites were used as the list using DAVID Functional annotation Tool ([Huang et al. 2009a](#_ENREF_8); [Huang et al. 2009b](#_ENREF_9)).

For EBNA2 and RPBJ binding sites, we downloaded ChIP-sequencing data for EBNA2 and RBPJ from GEO (GSE29498)([Zhao et al. 2011](#_ENREF_19)) and aligned the fastq data using Bowtie as with H3K4me3 data above. Peaks of enrichment were determined using MACS with default parameters.

**RNA-sequencing**

RNA was extracted from B cells and LCLs using TRIzol (Invitrogen). RNAs were depleted of ribosomal RNA (Ribo-Zero rRNA removal kit, Illumina). Eluted RNAs were prepared for sequencing according to Illumina protocols, and sequenced on the HiSeq 2500 Illumina platform. Reads were aligned to hg19 reference genome with hg19 Refseq gene annotation as a guide using HISAT with default parameters ([Kim et al. 2015](#_ENREF_10)). 56-65M 100bp x 100bp paired end reads were aligned for each library.

**Identification of LTR-driven transcripts**

Sequenced reads from each sample were aligned to the hg19 reference genome using Hisat2 --dta -k 1 with Refseq gene annotation to guide splice junctions ([Kim et al. 2015](#_ENREF_10)). Transcript assembles are then merged using Stringtie --merge. The first exon of each called transcript is removed from this dataset and the location of the first base is intersected with LTRs from hg19 RepeatMasker annotation (RepeatMasker ([Smit et al. 2013-2015](#_ENREF_16))). The number of reads mapping to this first exon are counted using bedtools coverageBed –counts ([Quinlan and Hall 2010](#_ENREF_14); [Quinlan 2014](#_ENREF_13)). Differential expression of the first exon of LTR-driven transcripts are then called used EdgeR ([Robinson et al. 2010](#_ENREF_15)) to find significant changes in gene expression. Cryptic transcripts are also selected by selecting LTR-driven transcripts with >10 reads mapping only in one condition. All scripts utilized for this analysis is found in Supplemental_Code.tar.gz file. LTR-driven transcripts were then intersected with activated H3K4me3 to reduce noise and manually screened.

**Usage of hg19 vs. GRCh38**

In this manuscript, we utilized hg19 reference genome rather than GRCh38 so that the results can be comparable to previous published results (e.g. ([Hoffman et al. 2013](#_ENREF_7); [Hansen et al. 2014](#_ENREF_5))). To examine the effects of the reference genome on our results, we examined the differences in LTRs annotated in the GRCh38 genome by RepeatMasker ([Smit et al. 2013-2015](#_ENREF_16)) and found that 99.9% of the hg19 LTRs overlap GRCh39 LTRs lifted over from hg19. Additionally, there is only ~5% (717,094 hg19 LTRs vs. 754,264 GRCh39 LTRs) difference between the two reference genomes. Based upon this, we therefore concluded that using the hg19 reference genome would not significantly alter our data and conclusions.

**Gene expression with PCR and qPCR analysis**

RNA was isolated from donor B cells and LCLs using TRIzol (Life Technologies). cDNA was generated from isolated RNAs using SuperScript IV Reverse Transcriptase Kit (Invitrogen) with random primers. PCR (30 cycles) was performed for *GAPDH,* and isoforms of *CSF1R,* *IRF5*, and *HUWE1*. For qPCR analysis, qPCR primers were generated for transcripts from *SORD2P*, *LINC01055*, *CERNA2*, *NCF2*, *RUNX3*, and *HUWE1* and used with KAPA SYBR Master Mix. Primers are available in **Supplemental Table S5.**

**Whole-genome bisulfite sequencing (WGBS) and bisulfite Sanger sequencing**

To assess the changes in DNA methylation genome-wide, we obtained WGBS data of B cells and donor-matched LCLs from GEO database (GSE49629) ([Hansen et al. 2014](#_ENREF_5)). BS-Seeker2 ([Guo et al. 2013](#_ENREF_4)) was used to obtain DNA methylation levels genome-wide. To obtain changes in DNA methylation, individual CpG methylation levels overlapping LTRs were obtained and averaged across the LTR locus and the values were compared B cells to matched LCLs. For analysis of +/- 20kb regions surrounding LTRs, 500bp non-overlapping bins were generated +/- 20kb. Averaged CpG methylation levels within each bin were determined and relative change was determined between matched B cell and LCL. To examine the impact of DNA methylation on changes in H3K4me3 at LTRs, averaged change in CpG methylation was determined for each LTR between matched B cell and LCLs. LTRs were stratified into quartiles and H3K4me3 fold change was determined for each quartile set of LTRs.

**ENCODE transcription factor, chromatin, and gene expression analysis**

For analysis of transcription factor binding at LTRs, ENCODE data for transcription factor ChIP-sequencing from GM12878 ([Dunham et al. 2012](#_ENREF_1)) were downloaded from UCSC Genome Browser (http://genome.ucsc.edu/encode/downloads.html). Specifically, all transcription factor binding sites by ChIP-seq in GM12878 cells ([Wang et al. 2013](#_ENREF_17)) were downloaded from the ENCODE/HAIB http://hgdownload.soe.ucsc.edu/goldenPath/hg19/encodeDCC/wgEncodeHaibTfbs/ and ENCODE/Stanford/Yale USC/Harvard http://hgdownload.soe.ucsc.edu/goldenPath/hg19/encodeDCC/wgEncodeSydhTfbs/. EBNA2 (GSE29498), RBPJ (GSE29498), and NF-kB subunits (GSE55105) were obtained from the NCBI Gene Expression Omnibus. We surveyed ~100 transcription factors. To determine occupancy of transcription factors at EBV-activated LTRs, presence or absence of transcription factor binding site from ENCODE at EBV-activated LTR was determine using BEDtools. For co-occupancy analysis, hierarchical clustering of pairwise correlations (Pearson) was performed.

To compare H3K4me3 enrichment at EBV-activated LTRs in GM12878 and other cell lines (H1, Hela S3, HepG2, HUVEC, and K562), H3K4me3 ChIP-seq fastq data was downloaded from UCSC Genome Browser. Reads were aligned to hg19 genome as described above using Bowtie. Number of reads (counts) was determined for each cell line and hierarchical clustering was performed across each LTR and across the cell lines. For the genome segmentation analysis, Combined Segway and ChromHMM data ([Ernst and Kellis 2010](#_ENREF_2); [Ernst and Kellis 2012](#_ENREF_3); [Hoffman et al. 2012](#_ENREF_6); [Hoffman et al. 2013](#_ENREF_7)) were downloaded from UCSC Genome Browser. For each EBV-activated LTR, overlapping chromatin state was determined. For those with two or more overlapping chromatin states, the state with the greatest portion of the LTR was selected for frequency analysis.

To determine the impact of EBV-activated LTRs on neighboring genes in GM12878 and other ENCODE cell lines, we downloaded ENCODE gene expression data from UCSC Genome Browser (http://genome.ucsc.edu/encode/downloads.html). The immediate adjacent gene from EBV-activated LTR was determined and FPKM of that gene was analyzed across all cell lines.

**PCR analysis**

Genomic DNA was isolated from B cells and LCLs with 0.5% SDS lysis buffer (0.5% SDS, 50mM HEPES pH 7.5, 150mM NaCl, 1mM EDTA,1.0% Triton X-100, 5mM NaF) and DNA was extracted with a standard phenol-chloroform/ethanol precipitation protocol. PCR analysis was performed with specific primers targeting HERSVS71 and LTR8. Primer sequences can be found in **Supplemental Table S5**.

**DESeq2 Commands:**

library('DESeq2')

## Directory with all counts files

directory<-"../counts-LTR-w-peaks/"

## link to all files in directory -- call them sample files

sampleFiles<-grep("counts.txt",list.files(directory),value=TRUE)

## setup groups in order of file names

sampleCondition<-c('B', 'B', 'B', 'L', 'L', 'L')

sampleTable<-data.frame(sampleName=sampleFiles, fileName=sampleFiles, condition=sampleCondition)

ddsHTSeq<-DESeqDataSetFromHTSeqCount(sampleTable=sampleTable, directory=directory, design=~condition)

colData(ddsHTSeq)$condition<-factor(colData(ddsHTSeq)$condition, levels=c("B","L"))

dds<-DESeq(ddsHTSeq)

res<-results(dds)

res<-res[order(res$padj),]

head(res)

plotMA(dds,ylim=c(-2,2),main="DESeq2")

dev.copy(png,"deseq2_MAplot.png")

dev.off()

f <-res[which(res$padj<=0.05),]

write.table(f, sep='\t', quote=F, file="sig-5e-2.txt")

Dunham I Kundaje A Aldred SF Collins PJ Davis C Doyle F Epstein CB Frietze S Harrow J Kaul R et al. 2012. An integrated encyclopedia of DNA elements in the human genome. *Nature* **489**(7414): 57-74.

Ernst J, Kellis M. 2010. Discovery and characterization of chromatin states for systematic annotation of the human genome. *Nat Biotechnol* **28**(8): 817-U894.

-. 2012. ChromHMM: automating chromatin-state discovery and characterization. *Nat Methods* **9**(3): 215-216.

Guo WL, Fiziev P, Yan WH, Cokus S, Sun XG, Zhang MQ, Chen PY, Pellegrini M. 2013. BS-Seeker2: a versatile aligning pipeline for bisulfite sequencing data. *Bmc Genomics* **14**.

Hansen KD, Sabunciyan S, Langmead B, Nagy N, Curley R, Klein G, Klein E, Salamon D, Feinberg AP. 2014. Large-scale hypomethylated blocks associated with Epstein-Barr virus-induced B-cell immortalization. *Genome Res* **24**(2): 177-184.

Hoffman MM, Buske OJ, Wang J, Weng ZP, Bilmes JA, Noble WS. 2012. Unsupervised pattern discovery in human chromatin structure through genomic segmentation. *Nat Methods* **9**(5): 473-U488.

Hoffman MM, Ernst J, Wilder SP, Kundaje A, Harris RS, Libbrecht M, Giardine B, Ellenbogen PM, Bilmes JA, Birney E et al. 2013. Integrative annotation of chromatin elements from ENCODE data. *Nucleic Acids Research* **41**(2): 827-841.

Huang DW, Sherman BT, Lempicki RA. 2009a. Bioinformatics enrichment tools: paths toward the comprehensive functional analysis of large gene lists. *Nucleic Acids Research* **37**(1): 1-13.

-. 2009b. Systematic and integrative analysis of large gene lists using DAVID bioinformatics resources. *Nature Protocols* **4**(1): 44-57.

Kim D, Landmead B, Salzberg SL. 2015. HISAT: a fast spliced aligner with low memory requirements. *Nat Methods* **12**(4): 357-U121.

Langmead B. 2010. Aligning short sequencing reads with Bowtie. *Curr Protoc Bioinformatics* **Chapter 11**: Unit 11 17.

Love MI, Huber W, Anders S. 2014. Moderated estimation of fold change and dispersion for RNA-seq data with DESeq2. *Genome Biol* **15**(12): 550.

Quinlan AR. 2014. BEDTools: The Swiss-Army Tool for Genome Feature Analysis. *Curr Protoc Bioinformatics* **47**: 11 12 11-34.

Quinlan AR, Hall IM. 2010. BEDTools: a flexible suite of utilities for comparing genomic features. *Bioinformatics* **26**(6): 841-842.

Robinson MD, McCarthy DJ, Smyth GK. 2010. edgeR: a Bioconductor package for differential expression analysis of digital gene expression data. *Bioinformatics* **26**(1): 139-140.

Smit AF, Hubley R, Green P. 2013-2015. RepeatMasker Open-4.0.

Wang J, Zhuang JL, Iyer S, Lin X, Whitfield TW, Greven MC, Pierce BG, Dong XJ, Kundaje A, Cheng Y et al. 2013. Sequence features and chromatin structure around the genomic regions bound by 119 human transcription factors. *J Biomol Struct Dyn* **31**: 49-50.

Zhang Y, Liu T, Meyer CA, Eeckhoute J, Johnson DS, Bernstein BE, Nusbaum C, Myers RM, Brown M, Li W et al. 2008. Model-based analysis of ChIP-Seq (MACS). *Genome Biol* **9**(9): R137.

Zhao B, Zou J, Wang HF, Johannsen E, Peng CW, Quackenbush J, Mar JC, Morton CC, Freedman ML, Blacklow SC et al. 2011. Epstein-Barr virus exploits intrinsic B-lymphocyte transcription programs to achieve immortal cell growth. *Proceedings of the National Academy of Sciences of the United States of America* **108**(36): 14902-14907.
