# Supplementary material for: LTRs activated by Epstein-Barr virus–induced transformation of B cells alter the transcriptome
Source: HighWire-hosted journal article supplement (doi:10.1101/gr.233585.117), 2018-10-31
Supplement: Supplemental_Table_S1.xlsx [file Supplemental_Table_S1.xlsx]

## Sheet: Supp Table 1 - Frequency LTR 
		LTR Subfamily	Number activated	p_val
		MLT1D	32	0.013
		MLT1K	29	0.008
		THE1B	27	0.3
		MLT1B	25	0.052
		MLT1J	25	0.471
		MLT1C2	21	0.148
		MSTA	21	0.482
		LTR2B	19	0
		MLT1L	17	0.058
		MLT1N2	17	0
		MLT1A0	16	0.723
		THE1C	14	0.19
		LTR33	13	0.509
		MER21C	13	0.017
		LTR16C	12	0.047
		MLT1A	12	1
		MLT1F1	12	0.002
		MER41A	11	0
		MLT1I	11	0.406
		THE1D	11	0.699
		MLT1H	10	0.943
		LTR8	9	1
		MER41B	9	0.011
		MLT1C	9	0.997
		MLT1F	9	0.847
		MLT1G3	9	0.01
		LTR79	8	0.038
		MER21B	8	0.018
		MLT1E1A	8	0.035
		MLT1G1	8	0.044
		MLT1H1	8	0.07
		MLT1O	8	0.058
		MSTD	8	0.405
		LTR78	7	0.446
		MamRep605b	7	0.003
		MER74A	6	0.009
		MER90a	6	0.003
		MLT1F2	6	0.475
		MSTB	6	0.983
		Eutr18	5	0
		LOR1b	5	0.007
		LTR2	5	0.964
		LTR23	5	0.015
		LTR54	5	0.062
		LTR67B	5	0.218
		LTR88c	5	0.005
		MamGypsy2-I	5	0.071
		MER4A	5	0.258
		MER89	5	0.091
		MLT1A1	5	0.677
		MLT1E2	5	0.339
		MLT1E3	5	0.052
		MLT1J2	5	0.672
		MSTB1	5	0.389
		MSTC	5	0.211
		LTR16	4	1
		LTR16A2	4	0.116
		LTR16B	4	0.315
		LTR16B1	4	0.044
		LTR16E1	4	0.218
		LTR29	4	0.013
		LTR33A	4	0.368
		LTR40a	4	0.116
		LTR48B	4	0.024
		LTR49	4	0.398
		LTR56	4	0.031
		LTR81B	4	0.042
		LTR85a	4	0.086
		LTR85c	4	0.032
		LTR91A	4	0.126
		MER31A	4	0.062
		MER54A	4	0.021
		MER65D	4	0.006
		MER83	4	0.076
		MLT1H2	4	0.564
		MLT1M	4	0.122
		MLT2B4	4	0.485
		PABL_A	4	0.059
		THE1A	4	0.659
		LTR101_Mam	3	0.104
		LTR104_Mam	3	0.198
		LTR12C	3	0.578
		LTR12F	3	0.02
		LTR16E2	3	0.313
		LTR1A2	3	0.058
		LTR24B	3	0.026
		LTR37A	3	0.277
		LTR40b	3	0.096
		LTR41	3	0.36
		LTR45C	3	0.025
		LTR50	3	0.36
		LTR5B	3	0.031
		LTR69	3	0.002
		LTR72	3	0.015
		LTR78B	3	0.427
		LTR7C	3	0.003
		LTR86A1	3	0.026
		LTR88a	3	0.055
		LTR88b	3	0.169
		LTR9	3	0.928
		MamGypLTR1c	3	0.083
		MER21A	3	0.273
		MER31B	3	0.173
		MER39B	3	0.109
		MER41G	3	0.001
		MER4B	3	0.547
		MER4C	3	0.166
		MER4E	3	0.256
		MER4E1	3	0.116
		MER51B	3	0.04
		MER68	3	0.391
		MER68B	3	0.025
		MER74B	3	0.076
		MER77	3	0.433
		MER90	3	0.274
		MLT1G	3	0.967
		MLT1J1	3	0.731
		MLT2A1	3	0.529
		Eutr10	2	0.229
		EUTREP15	2	0.024
		LTR106_Mam	2	0.142
		LTR10C	2	0.119
		LTR19B	2	0.059
		LTR22B	2	0.05
		LTR24C	2	0.06
		LTR32	2	0.259
		LTR33B	2	0.35
		LTR36	2	0.103
		LTR39	2	0.337
		LTR45	2	0.235
		LTR55	2	0.087
		LTR75	2	0.13
		LTR8A	2	0.369
		LTR9B	2	0.166
		MamGypLTR1b	2	0.245
		MamGypLTR3	2	0.423
		MamGypLTR4	2	0.13
		MER110	2	0.4
		MER11C	2	0.247
		MER34	2	0.943
		MER34A	2	0.5
		MER34B	2	0.269
		MER41C	2	0.178
		MER49	2	0.32
		MER50	2	0.774
		MER51A	2	0.235
		MER54B	2	0.101
		MER57B1	2	0.233
		MER57B2	2	0.228
		MER57D	2	0.062
		MER57F	2	0.08
		MER65A	2	0.322
		MER66C	2	0.092
		MER87B	2	0.036
		MLT2B1	2	0.827
		MLT2B2	2	0.49
		MLT2E	2	0.064
		ERV3-16A3_LTR	1	0.56
		Eutr5	1	0.245
		EUTREP8	1	0.188
		LOR1a	1	0.483
		LTR108a_Mam	1	0.073
		LTR10E	1	0.186
		LTR13	1	0.555
		LTR13_	1	0.045
		LTR14	1	0.526
		LTR15	1	0.229
		LTR16A	1	1
		LTR16A1	1	0.88
		LTR16B2	1	0.655
		LTR16D	1	0.672
		LTR19C	1	0.109
		LTR1B1	1	0.145
		LTR22C0	1	0.099
		LTR26B	1	0.076
		LTR26C	1	0.205
		LTR27	1	0.701
		LTR27E	1	0.188
		LTR31	1	0.198
		LTR33A_	1	0.722
		LTR33C	1	0.497
		LTR37B	1	0.72
		LTR38	1	0.475
		LTR38A1	1	0.113
		LTR3B_	1	0.146
		LTR40c	1	0.375
		LTR41C	1	0.383
		LTR42	1	0.205
		LTR43B	1	0.177
		LTR46	1	0.202
		LTR5	1	1
		LTR52	1	0.579
		LTR54B	1	0.465
		LTR57	1	0.328
		LTR5_Hs	1	0.488
		LTR65	1	0.297
		LTR7	1	1
		LTR71A	1	0.115
		LTR73	1	0.133
		LTR75_1	1	0.104
		LTR76	1	0.168
		LTR7B	1	0.488
		LTR81	1	0.876
		LTR82B	1	0.494
		LTR84a	1	0.313
		LTR86A2	1	0.176
		LTR89	1	0.701
		LTR89B	1	0.405
		LTR8B	1	0.68
		LTR90B	1	0.304
		LTR9D	1	0.432
		MamGypLTR1a	1	0.504
		MamGypLTR2b	1	0.454
		MamGypLTR2c	1	0.493
		MamGypLTR3a	1	0.548
		MamRep605	1	0.982
		MER101	1	0.623
		MER110A	1	0.33
		MER34C	1	0.592
		MER34C_	1	0.351
		MER34C2	1	0.312
		MER39	1	0.951
		MER41D	1	0.317
		MER4A1	1	0.869
		MER4A1_	1	0.27
		MER4CL34	1	0.427
		MER4D	1	0.899
		MER4D0	1	0.264
		MER50B	1	0.43
		MER52A	1	0.768
		MER52D	1	0.406
		MER57A1	1	0.538
		MER57C1	1	0.126
		MER57C2	1	0.298
		MER57E3	1	0.214
		MER61A	1	0.473
		MER61B	1	0.276
		MER61F	1	0.128
		MER65C	1	0.411
		MER66A	1	0.271
		MER66B	1	0.723
		MER67A	1	0.301
		MER67C	1	0.667
		MER70B	1	0.287
		MER72	1	0.514
		MER72B	1	0.122
		MER73	1	0.192
		MER76	1	0.433
		MER77B	1	0.612
		MER83B	1	0.285
		MER9a2	1	0.249
		MER9a3	1	0.396
		MLT1E1	1	0.945
		MLT2A2	1	0.944
		MLT2C1	1	0.834
		MLT2C2	1	0.572
		MLT2D	1	0.928
		MLT2F	1	0.734
		MSTA1	1	0.383
		MSTB2	1	0.694
		PRIMA4_LTR	1	0.242
