# Supplementary material for: LTRs activated by Epstein-Barr virus–induced transformation of B cells alter the transcriptome
Source: HighWire-hosted journal article supplement (doi:10.1101/gr.233585.117), 2018-10-31
Supplement: Supplemental_Table_S2.xlsx [file Supplemental_Table_S2.xlsx]

## Sheet: Supp Table S2 - TF Subfamily
	RUNX3			MTA3			WHIP			NFIC			EBF1			ATF2			FOXM1			PML			RELB			BHLHE40C
MLT1D	22		MLT1D	19		MLT1D	20		LTR2B	18		THE1B	18		MSTA	16		LTR2B	14		MSTA	15		MLT1D	16		THE1B	14
MLT1K	18		MSTA	16		MLT1B	15		MSTA	18		MLT1D	16		MLT1K	13		MLT1D	14		MLT1D	14		THE1B	14		MLT1D	12
MSTA	17		MLT1K	14		Harlequin-int	14		MLT1D	17		MLT1K	15		THE1B	13		MSTA	14		THE1B	11		MSTA	12		MSTA	11
THE1B	16		THE1B	13		MLT1K	14		THE1B	15		MSTA	13		MLT1D	12		THE1B	12		MLT1K	9		MLT1C2	10		LTR2B	9
LTR2B	14		MLT1B	12		MLT1N2	14		MLT1B	14		LTR2B	11		MLT1B	9		MLT1K	10		LTR16C	8		MLT1K	10		MLT1J	9
MER21C	13		MLT1J	12		MLT1C2	12		MLT1K	14		MLT1J	11		MLT1J	9		Harlequin-int	9		LTR2B	8		MLT1J	8		MLT1K	9
MLT1B	13		MLT1N2	11		MSTA	12		Harlequin-int	13		MLT1N2	10		MLT1L	9		LTR33	9		LTR33	8		MLT1N2	8		MER21C	8
MLT1J	12		LTR16C	10		MLT1J	11		MLT1J	12		MLT1B	9		MLT1N2	9		MER21C	8		MER21C	8		LTR16C	7		LTR33	7
MLT1N2	12		LTR33	10		MER21C	10		MLT1L	12		MLT1L	9		MLT1H	8		MLT1B	8		MLT1N2	8		LTR33	7		MLT1H	7
LTR33	11		MLT1A0	10		MLT1H	10		LTR33	10		LTR16C	8		LTR16C	7		MLT1J	8		MLT1H	7		MER21C	7		MLT1N2	7
MLT1C2	11		MLT1C2	10		MLT1L	10		MER21C	10		LTR33	8		LTR33	7		MLT1L	8		MLT1J	7		MLT1A0	7		THE1C	7
MLT1L	11		MLT1F1	9		LTR2B	9		MLT1N2	10		MLT1H	8		MER21C	7		MLT1N2	8		MLT1L	7		MLT1B	7		MLT1F1	6
Harlequin-int	10		MLT1H	9		MLT1A0	9		LTR16C	9		MER21C	7		MLT1A0	7		ERVL-B4-int	6		THE1C	7		MLT1H	7		MLT1L	6
LTR16C	9		MLT1L	9		THE1B	9		MLT1A	8		MLT1G3	7		THE1C	7		LTR16C	6		ERVL-B4-int	6		MLT1F	6		ERVL-B4-int	5
MLT1A0	9		LTR2B	8		LTR33	8		MLT1C2	8		THE1C	7		ERVL-B4-int	6		LTR8	6		MLT1B	6		MLT1L	6		Harlequin-int	5
MLT1H	9		MER21C	8		MLT1F1	8		MLT1H	8		LTR8	6		LTR2B	6		MER41B	6		MLT1C2	6		THE1C	6		MER21B	5
MLT1F1	8		THE1C	8		THE1C	8		ERVL-B4-int	7		MER41B	6		LTR8	6		MLT1A0	6		Harlequin-int	5		THE1D	6		MLT1A0	5
THE1C	8		ERVL-B4-int	7		ERVL-B4-int	7		MER41B	7		MLT1A	6		MLT1F1	6		MLT1F1	6		LTR78	5		LOR1b	5		MLT1B	5
MER41B	7		Harlequin-int	7		LTR16C	7		MLT1A0	7		MLT1C2	6		Harlequin-int	5		MLT1H	6		LTR8	5		LTR8	5		LTR16C	4
MLT1A	7		LTR8	7		MLT1A	7		THE1C	7		MLT1F1	6		LOR1b	5		THE1C	6		MamGyp-int	5		MER41B	5		LTR81B	4
MLT1F	7		MLT1A	7		MLT1C	7		LTR8	6		MLT1F	6		MamGyp-int	5		LOR1b	5		MLT1A0	5		LTR2B	4		MamGyp-int	4
MLT1G3	7		MER41B	6		MLT1H1	7		MLT1F1	6		ERVL-B4-int	5		MER41B	5		MLT1A	5		MLT1A	5		LTR37-int	4		MER41B	4
MLT1H1	7		MLT1C	6		MLT1I	7		MLT1G3	6		Harlequin-int	5		MLT1A	5		MLT1C	5		MLT1C	5		LTR67B	4		MER90a	4
ERVL-B4-int	6		MLT1I	6		MSTD	7		MSTB	6		LTR78	5		MLT1C2	5		Eutr18	4		MLT1F1	5		LTR78	4		MLT1A	4
LTR8	6		THE1D	6		MER41B	6		THE1D	6		MER21B	5		MLT1F	5		LTR67B	4		MLT1F	5		MamGyp-int	4		MLT1F	4
MLT1C	6		Eutr18	5		LTR23	5		Eutr18	5		MER4-int	5		THE1D	5		MamGyp-int	4		LOR1b	4		MER4-int	4		MLT1G3	4
MLT1I	6		LOR1b	5		LTR54	5		LOR1b	5		MLT1A0	5		Eutr18	4		MER21B	4		LTR67B	4		MLT1A1	4		MLT1H1	4
THE1D	6		LTR78	5		LTR67B	5		LTR78	5		MLT1I	5		LTR54	4		MER74A	4		MER41B	4		MLT1E1A	4		MSTB	4
Eutr18	5		MamGyp-int	5		MamRep605b	5		MamGyp-int	5		MSTD	5		LTR67B	4		MLT1F	4		MLT1I	4		MSTD	4		THE1D	4
LOR1b	5		MLT1E1A	5		MER21B	5		MER21B	5		THE1D	5		MER21B	4		MLT1G3	4		MSTB	4		Harlequin-int	3		ERV3-16A3_I-int	3
LTR67B	5		MLT1F	5		MER4A	5		MLT1C	5		LOR1b	4		MLT1C	4		MLT1H1	4		THE1D	4		LTR16B1	3		LOR1b	3
MamGyp-int	5		MLT1G3	5		MLT1G3	5		MLT1F	5		LTR16B1	4		MLT1E3	4		MLT1I	4		Eutr18	3		LTR45C	3		LTR16B1	3
MER21B	5		MSTD	5		MLT1O	5		MLT1G1	5		LTR54	4		MLT1H1	4		MSTB	4		LTR16B1	3		LTR81B	3		LTR16B	3
MER74A	5		LTR16A2	4		ERVL-E-int	4		MLT1I	5		MamGyp-int	4		LTR16B1	3		THE1D	4		LTR16B	3		LTR86A1	3		LTR16E1	3
MLT1G1	5		LTR16B	4		LTR16B1	4		LTR16B1	4		MamRep605b	4		LTR16E1	3		LTR16A2	3		LTR16E1	3		MamRep605b	3		LTR49	3
MLT1O	5		LTR23	4		LTR78	4		LTR48B	4		MER74A	4		LTR45C	3		LTR16B1	3		LTR45C	3		MER4A	3		LTR8	3
MSTB	5		LTR54	4		MER89	4		LTR67B	4		MER90a	4		LTR48B	3		LTR16B	3		LTR48B	3		MER74A	3		LTR88a	3
MSTD	5		LTR67B	4		MLT1E1A	4		MER74A	4		MLT1C	4		LTR78	3		LTR16E1	3		LTR54	3		MER83	3		MamRep605b	3
LTR16B1	4		MER21B	4		MLT1F2	4		MLT1E1A	4		MLT1E3	4		LTR78B	3		LTR54	3		LTR78B	3		MER90	3		MER74A	3
LTR16B	4		MER74A	4		MLT1G1	4		MLT1H1	4		MLT1H1	4		LTR86A1	3		LTR78	3		LTR81B	3		MLT1A	3		MER90	3
LTR23	4		MER90a	4		MLT1J2	4		MSTD	4		MLT1O	4		MER21A	3		LTR78B	3		LTR86A1	3		MLT1C	3		MLT1C2	3
LTR78	4		MLT1G1	4		MSTB1	4		LTR16B	3		MSTB1	4		MER74A	3		LTR86A1	3		LTR88a	3		MLT1E3	3		MLT1C	3
LTR88c	4		MLT1H1	4		THE1D	4		LTR16E1	3		LTR16B	3		MER90	3		LTR88a	3		LTR91A	3		MLT1F1	3		MLT1I	3
MamRep605b	4		MLT1H2	4		ERV3-16A3_I-int	3		LTR2	3		LTR16E1	3		MER90a	3		MER21A	3		MER21A	3		MLT1F2	3		MLT1O	3
MER41A	4		MLT1O	4		LTR104_Mam	3		LTR29	3		LTR23	3		MLT1E1A	3		MER39B	3		MER21B	3		MLT1G3	3		MSTD	3
MER90a	4		MSTB	4		LTR16A2	3		LTR37-int	3		LTR29	3		MLT1G1	3		MER83	3		MER41G	3		MLT1H1	3		ERVL-E-int	2
MLT1E3	4		MSTC	4		LTR16B	3		LTR45C	3		LTR37-int	3		MLT1G3	3		MER89	3		MER83	3		MLT1O	3		HERV3-int	2
MLT1H2	4		LTR16B1	3		LTR16E1	3		LTR50	3		LTR45C	3		MLT1H2	3		MER90	3		MLT1A1	3		MSTB	3		HERVP71A-int	2
MLT1J2	4		LTR16E1	3		LTR29	3		LTR54	3		LTR48B	3		MSTB	3		MLT1A1	3		MLT1E3	3		ERV3-16A3_I-int	2		LTR101_Mam	2
HERVH-int	3		LTR33A	3		LTR33A	3		LTR72	3		LTR50	3		EUTREP15	2		MLT1C2	3		MLT1G1	3		EUTREP15	2		LTR10C	2
LTR16	3		LTR37A	3		LTR48B	3		LTR78B	3		LTR67B	3		HERVL40-int	2		MLT1E3	3		MLT1G3	3		HERVE-int	2		LTR12C	2
LTR16A2	3		LTR40b	3		LTR78B	3		LTR86A1	3		LTR79	3		LTR101_Mam	2		MLT1G1	3		MLT1H1	3		LTR16A2	2		LTR2	2
LTR16E1	3		LTR45C	3		LTR8	3		LTR88a	3		LTR81B	3		LTR16A2	2		MSTD	3		MLT1O	3		LTR16E1	2		LTR24B	2
LTR37-int	3		LTR48B	3		LTR85c	3		LTR91A	3		LTR85a	3		LTR16B	2		ERV3-16A3_I-int	2		MSTD	3		LTR1A2	2		LTR29	2
LTR45C	3		LTR49	3		LTR86A1	3		MamRep605b	3		LTR85c	3		LTR23	2		LTR101_Mam	2		LTR101_Mam	2		LTR2	2		LTR33B	2
LTR48B	3		LTR50	3		LTR88a	3		MER21A	3		LTR86A1	3		LTR33B	2		LTR2	2		LTR16A2	2		LTR33A	2		LTR37-int	2
LTR50	3		LTR72	3		LTR88b	3		MER41G	3		LTR88a	3		LTR36	2		LTR33B	2		LTR23	2		LTR33B	2		LTR39	2
LTR54	3		LTR78B	3		LTR88c	3		MER89	3		MER21A	3		LTR37A	2		LTR36	2		LTR33A	2		LTR37A	2		LTR48B	2
LTR72	3		LTR81B	3		LTR91A	3		MER90	3		MER41A	3		LTR37-int	2		LTR37-int	2		LTR33B	2		LTR39	2		LTR50	2
LTR78B	3		LTR86A1	3		MamGyp-int	3		MER90a	3		MER54A	3		LTR49	2		LTR45C	2		LTR36	2		LTR49	2		LTR54	2
LTR7C	3		LTR88a	3		MER21A	3		MLT1A1	3		MER89	3		LTR50	2		LTR48B	2		LTR37-int	2		LTR50	2		LTR67B	2
LTR86A1	3		LTR91A	3		MER31A	3		MLT1E3	3		MER90	3		LTR5B	2		LTR5B	2		LTR49	2		LTR54	2		LTR78	2
LTR88a	3		MamRep605b	3		MER54A	3		MLT1H2	3		MLT1A1	3		LTR69	2		LTR69	2		LTR72	2		LTR56	2		LTR78B	2
LTR91A	3		MER21A	3		MER65D	3		MLT1J1	3		MLT1E1A	3		LTR72	2		LTR7C	2		LTR85a	2		LTR5B	2		LTR7C	2
MER21A	3		MER41G	3		MER68	3		MLT1O	3		MLT1E2	3		LTR81B	2		LTR81B	2		LTR85c	2		LTR69	2		LTR85c	2
MER41G	3		MER54A	3		MER74A	3		MSTC	3		MLT1G1	3		LTR85a	2		MER31A	2		LTR88b	2		LTR85a	2		MER21A	2
MER4C	3		MER65D	3		MER90	3		ERVL-E-int	2		MLT1H2	3		LTR88a	2		MER41G	2		LTR88c	2		LTR88a	2		MER21-int	2
MER4-int	3		MER83	3		MER90a	3		Eutr10	2		MLT1J1	3		LTR91A	2		MER4A	2		MamGypLTR1b	2		MamGypLTR1c	2		MER31A	2
MER89	3		MER89	3		MLT1E3	3		HERVE-int	2		MLT1J2	3		MamRep605b	2		MER4E1	2		MamGypLTR3	2		MamGypLTR4	2		MER39B	2
MER90	3		MER90	3		MLT1F	3		LTR101_Mam	2		MSTB	3		MER31A	2		MER57B1	2		MamRep605b	2		MamGypsy2-I	2		MER4-int	2
MLT1A1	3		MLT1A1	3		MLT1G	3		LTR12C	2		ERVL-E-int	2		MER4A	2		MER57D	2		MER4A	2		MER21A	2		MER51A	2
MLT1E1A	3		MLT1E2	3		MLT1M	3		LTR16	2		Eutr18	2		MER4C	2		MER90a	2		MER54B	2		MER31A	2		MER57B1	2
MLT1F2	3		MLT1E3	3		MLT2A1	3		LTR16A2	2		EUTREP15	2		MER54A	2		MLT1E1A	2		MER57A-int	2		MER34	2		MER57F	2
MLT1J1	3		MLT1J1	3		MSTB	3		LTR23	2		HERVH-int	2		MER54B	2		MLT1G	2		MER57F	2		MER39B	2		MER65D	2
MLT1M	3		MSTB1	3		MSTB-int	3		LTR24C	2		HERVP71A-int	2		MER57A-int	2		MLT1H1-int	2		MER66C	2		MER41A	2		MER68	2
MLT2B4	3		ERV3-16A3_I-int	2		HERV3-int	2		LTR33A	2		LTR101_Mam	2		MER57B1	2		MLT1H2	2		MER74A	2		MER57A-int	2		MER77	2
MSTB1	3		ERVL-E-int	2		HERVL40-int	2		LTR33B	2		LTR104_Mam	2		MER57B2	2		MLT1M	2		MER89	2		MER57D	2		MLT1A1	2
MSTB-int	3		HERVL40-int	2		LOR1b	2		LTR36	2		LTR12C	2		MER83	2		MLT1O	2		MER90	2		MER68	2		MLT1E1A	2
MSTC	3		HERVL-int	2		LTR101_Mam	2		LTR49	2		LTR1A2	2		MER89	2		MSTB-int	2		MER90a	2		MER77	2		MLT1E3	2
THE1A	3		HERVP71A-int	2		LTR16E2	2		LTR5B	2		LTR33A	2		MLT1A1	2		ERVL-E-int	1		MLT1E1A	2		MER89	2		MLT1G1	2
THE1A-int	3		LOR1-int	2		LTR2	2		LTR69	2		LTR33B	2		MLT1G	2		Eutr10	1		MLT1G	2		MER90a	2		MLT1G	2
ERV3-16A3_I-int	2		LTR101_Mam	2		LTR24B	2		LTR7C	2		LTR36	2		MLT1H1-int	2		EUTREP15	1		MLT1H1-int	2		MLT1E2	2		MLT1H1-int	2
ERVL-E-int	2		LTR12C	2		LTR33B	2		LTR81B	2		LTR39	2		MLT1I	2		HERVE-int	1		MLT1H2	2		MLT1H2	2		MLT1H2	2
Eutr10	2		LTR24C	2		LTR37A	2		LTR85a	2		LTR49	2		MLT1M	2		HERVIP10FH-int	1		MLT1M	2		MLT1I	2		MLT1J1	2
HERV3-int	2		LTR33B	2		LTR37-int	2		LTR88b	2		LTR56	2		MLT1O	2		HERVK9-int	1		MSTB-int	2		MLT1J2	2		MLT1J2	2
HERVE-int	2		LTR36	2		LTR39	2		LTR88c	2		LTR5B	2		MLT2E	2		HERVL-int	1		PRIMA41-int	2		MLT2B1	2		MLT2E	2
HERVL40-int	2		LTR37-int	2		LTR45C	2		MER21-int	2		LTR72	2		MSTB1	2		HERVP71A-int	1		ERV24_Prim-int	1		MLT2E	2		MSTB-int	2
HERVL-int	2		LTR39	2		LTR53-int	2		MER31A	2		LTR78B	2		MSTD	2		HUERS-P1-int	1		ERV3-16A3_I-int	1		MSTB-int	2		PRIMA41-int	2
HERVP71A-int	2		LTR49-int	2		LTR56	2		MER39B	2		LTR7C	2		THE1A	2		LOR1-int	1		ERVL-E-int	1		PRIMA41-int	2		ERV24_Prim-int	1
LTR101_Mam	2		LTR56	2		LTR5B	2		MER41A	2		LTR91A	2		ERV24_Prim-int	1		LTR104_Mam	1		Eutr10	1		ERVL-B4-int	1		ERV3-16A3_LTR	1
LTR12C	2		LTR5B	2		LTR69	2		MER4A	2		MamGypLTR1b	2		ERV3-16A3_I-int	1		LTR106_Mam	1		EUTREP15	1		ERVL-E-int	1		Eutr10	1
LTR2	2		LTR69	2		LTR72	2		MER4C	2		MamGypLTR1c	2		ERVL-E-int	1		LTR108a_Mam	1		HERVE-int	1		Eutr18	1		EUTREP15	1
LTR29	2		LTR85a	2		LTR7C	2		MER4E1	2		MamGypsy2-I	2		Eutr10	1		LTR12C	1		HERVIP10B3-int	1		HERV3-int	1		HERVE-int	1
LTR32	2		LTR85c	2		LTR81B	2		MER54A	2		MER21-int	2		HERV3-int	1		LTR16	1		HERVL-int	1		HERVIP10FH-int	1		HERVIP10FH-int	1
LTR33B	2		LTR88b	2		MamGypLTR1b	2		MER54B	2		MER31A	2		HERVE-int	1		LTR16A	1		HERVP71A-int	1		HERVP71A-int	1		HERVL40-int	1
LTR36	2		LTR88c	2		MamGypsy2-I	2		MER57A-int	2		MER34B	2		HERVIP10B3-int	1		LTR1A2	1		HUERS-P1-int	1		HUERS-P1-int	1		HERVL-int	1
LTR37A	2		LTR8A	2		MER31B	2		MER57B1	2		MER39B	2		HERVIP10FH-int	1		LTR22C0	1		LOR1-int	1		LOR1-int	1		HUERS-P1-int	1
LTR39	2		MamGypLTR1b	2		MER39B	2		MER57D	2		MER41G	2		HERVK9-int	1		LTR23	1		LTR104_Mam	1		LTR101_Mam	1		LOR1a	1
LTR49	2		MamGypLTR3	2		MER41A	2		MER57F	2		MER4A	2		HERVL-int	1		LTR26B	1		LTR106_Mam	1		LTR104_Mam	1		LOR1-int	1
LTR56	2		MER31A	2		MER41G	2		MER66-int	2		MER4C	2		HERVP71A-int	1		LTR29	1		LTR108a_Mam	1		LTR106_Mam	1		LTR106_Mam	1
LTR5B	2		MER39B	2		MER4E	2		MER68	2		MER4E1	2		HUERS-P1-int	1		LTR33A_	1		LTR12C	1		LTR108a_Mam	1		LTR108a_Mam	1
LTR69	2		MER4A	2		MER4-int	2		MER68-int	2		MER57B1	2		LOR1-int	1		LTR33A	1		LTR16	1		LTR10C	1		LTR10E	1
LTR79	2		MER4E1	2		MER57A-int	2		MER77	2		MER57F	2		LTR106_Mam	1		LTR37A	1		LTR16A	1		LTR12C	1		LTR12F	1
LTR81B	2		MER54B	2		MER57D	2		MER83	2		MER66-int	2		LTR108a_Mam	1		LTR37B	1		LTR16B2	1		LTR15	1		LTR13_	1
LTR85a	2		MER57A-int	2		MER68-int	2		MLT1F2	2		MER68	2		LTR12C	1		LTR38	1		LTR16E2	1		LTR16B	1		LTR13	1
LTR85c	2		MER57B1	2		MER74B	2		MLT1G	2		MLT1F2	2		LTR16	1		LTR38A1	1		LTR19B	1		LTR16E2	1		LTR16A	1
LTR88b	2		MER57D	2		MER83	2		MLT1H1-int	2		MLT1G	2		LTR16A	1		LTR39	1		LTR1A2	1		LTR19B	1		LTR16A1	1
LTR8A	2		MER57F	2		MLT1A1	2		MLT1J2	2		MLT1H1-int	2		LTR16A1	1		LTR3B_	1		LTR22C0	1		LTR22C0	1		LTR16A2	1
MamGypLTR1b	2		MER68	2		MLT1E2	2		MLT1M	2		MLT1M	2		LTR16E2	1		LTR40c	1		LTR24C	1		LTR23	1		LTR19B	1
MamGypLTR3	2		MER77	2		MLT1H1-int	2		MLT2B1	2		MLT2A1	2		LTR1A2	1		LTR41C	1		LTR26B	1		LTR26B	1		LTR1A2	1
MamGypsy2-I	2		MLT1F2	2		MLT1H2	2		MLT2B4	2		MLT2B4	2		LTR2	1		LTR42	1		LTR33A_	1		LTR27	1		LTR22C0	1
MER21-int	2		MLT1G	2		MLT1J1	2		MLT2E	2		MSTB-int	2		LTR22C0	1		LTR43B	1		LTR37A	1		LTR27E	1		LTR23	1
MER31A	2		MLT1H1-int	2		MLT2B4	2		MSTB1	2		MSTC	2		LTR24C	1		LTR49	1		LTR37B	1		LTR31	1		LTR26B	1
MER39B	2		MLT1J2	2		MSTA-int	2		MSTB-int	2		PRIMA41-int	2		LTR26B	1		LTR49-int	1		LTR38	1		LTR32	1		LTR32	1
MER41-int	2		MLT1M	2		MSTC	2		PRIMA41-int	2		THE1A	2		LTR29	1		LTR50	1		LTR38A1	1		LTR33A_	1		LTR33A_	1
MER4A	2		MLT2B4	2		PRIMA41-int	2		THE1A	2		ERV24_Prim-int	1		LTR31	1		LTR54B	1		LTR39	1		LTR36	1		LTR33A	1
MER4E1	2		MLT2E	2		THE1A	2		ERV3-16A3_I-int	1		ERV3-16A3_I-int	1		LTR32	1		LTR56	1		LTR40b	1		LTR37B	1		LTR36	1
MER50	2		MSTB-int	2		ERV3-16A3_LTR	1		ERV3-16A3_LTR	1		Eutr10	1		LTR33A_	1		LTR57	1		LTR40c	1		LTR38	1		LTR37A	1
MER54A	2		PRIMA41-int	2		Eutr10	1		EUTREP15	1		Eutr5	1		LTR33A	1		LTR65	1		LTR41C	1		LTR40a	1		LTR37B	1
MER54B	2		THE1A	2		Eutr18	1		HERVH-int	1		EUTREP8	1		LTR37B	1		LTR72	1		LTR42	1		LTR40c	1		LTR38	1
MER57A-int	2		ERV24_Prim-int	1		EUTREP15	1		HERVIP10FH-int	1		HERV3-int	1		LTR38	1		LTR75	1		LTR43B	1		LTR41	1		LTR38A1	1
MER57B1	2		ERV3-16A3_LTR	1		EUTREP8	1		HERVK9-int	1		HERVE-int	1		LTR38A1	1		LTR79	1		LTR49-int	1		LTR42	1		LTR3B_	1
MER57B2	2		Eutr10	1		HERVE-int	1		HERVL-int	1		HERVIP10FH-int	1		LTR39	1		LTR81	1		LTR50	1		LTR43B	1		LTR40c	1
MER65D	2		Eutr5	1		HERVH-int	1		HERVP71A-int	1		HERVK14-int	1		LTR3B_	1		LTR85a	1		LTR54B	1		LTR45	1		LTR41C	1
MER68	2		EUTREP15	1		HERVIP10B3-int	1		HUERS-P1-int	1		HERVL-int	1		LTR40c	1		LTR85c	1		LTR57	1		LTR48B	1		LTR42	1
MER68-int	2		EUTREP8	1		HERVIP10FH-int	1		LOR1a	1		HUERS-P1-int	1		LTR41C	1		LTR86A2	1		LTR65	1		LTR54B	1		LTR43B	1
MER77	2		HERVE-int	1		HERVP71A-int	1		LOR1-int	1		LOR1a	1		LTR42	1		LTR88b	1		LTR69	1		LTR57	1		LTR49-int	1
MLT1E2	2		HERVIP10B3-int	1		HUERS-P1-int	1		LTR104_Mam	1		LOR1-int	1		LTR43B	1		LTR9D	1		LTR75	1		LTR73	1		LTR54B	1
MLT1G	2		HERVIP10FH-int	1		LOR1a	1		LTR106_Mam	1		LTR106_Mam	1		LTR49-int	1		MamGypLTR1a	1		LTR79	1		LTR75	1		LTR57	1
MLT1H1-int	2		HERVK9-int	1		LOR1-int	1		LTR108a_Mam	1		LTR108a_Mam	1		LTR54B	1		MamGypLTR1b	1		LTR81	1		LTR75_1	1		LTR5B	1
MLT2E	2		HUERS-P1-int	1		LTR106_Mam	1		LTR12F	1		LTR10E	1		LTR56	1		MamGypLTR3a	1		LTR84a	1		LTR78B	1		LTR65	1
ERV24_Prim-int	1		LTR104_Mam	1		LTR108a_Mam	1		LTR16A	1		LTR15	1		LTR57	1		MamGypLTR4	1		LTR89	1		LTR79	1		LTR69	1
Eutr5	1		LTR106_Mam	1		LTR10C	1		LTR16E2	1		LTR16A	1		LTR65	1		MamGypsy2-I	1		MamGypLTR1a	1		LTR7C	1		LTR7	1
EUTREP15	1		LTR108a_Mam	1		LTR12C	1		LTR19B	1		LTR16A1	1		LTR75	1		MamRep605	1		MamGypLTR3a	1		LTR81	1		LTR72	1
HERVIP10FH-int	1		LTR10C	1		LTR12F	1		LTR19C	1		LTR16A2	1		LTR79	1		MamRep605b	1		MamGypLTR4	1		LTR85c	1		LTR73	1
HERVK9-int	1		LTR15	1		LTR13	1		LTR1A2	1		LTR16E2	1		LTR81	1		MER101	1		MamGypsy2-I	1		LTR86A2	1		LTR79	1
HUERS-P1-int	1		LTR16	1		LTR15	1		LTR22C0	1		LTR19B	1		LTR84a	1		MER21-int	1		MER101	1		LTR88c	1		LTR81	1
LOR1a	1		LTR16A	1		LTR16A	1		LTR24B	1		LTR19C	1		LTR85c	1		MER31B	1		MER31A	1		LTR9	1		LTR85a	1
LOR1-int	1		LTR16A1	1		LTR16A1	1		LTR26B	1		LTR2	1		LTR86A2	1		MER34A	1		MER31B	1		MamGypLTR2c	1		LTR86A1	1
LTR104_Mam	1		LTR16B2	1		LTR19B	1		LTR31	1		LTR22C0	1		LTR88b	1		MER34B	1		MER34	1		MER101	1		LTR86A2	1
LTR106_Mam	1		LTR16E2	1		LTR1A2	1		LTR32	1		LTR24C	1		LTR89	1		MER34C_	1		MER34B	1		MER110A	1		LTR88c	1
LTR108a_Mam	1		LTR19B	1		LTR1B1	1		LTR33A_	1		LTR26B	1		LTR9	1		MER41A	1		MER34C_	1		MER21B	1		LTR89	1
LTR10C	1		LTR19C	1		LTR22B	1		LTR37B	1		LTR27E	1		LTR9D	1		MER4B	1		MER39B	1		MER21-int	1		LTR8A	1
LTR12F	1		LTR1A2	1		LTR22C0	1		LTR38	1		LTR31	1		MamGypLTR1a	1		MER4D	1		MER41A	1		MER34B	1		LTR9	1
LTR13_	1		LTR2	1		LTR25-int	1		LTR38A1	1		LTR33A_	1		MamGypLTR1b	1		MER4-int	1		MER4B	1		MER41G	1		LTR91A	1
LTR13	1		LTR22C0	1		LTR26B	1		LTR39	1		LTR37B	1		MamGypLTR3a	1		MER51A	1		MER4D	1		MER41-int	1		LTR9B	1
LTR15	1		LTR26B	1		LTR27	1		LTR3B_	1		LTR38	1		MamGypLTR4	1		MER52D	1		MER4E	1		MER4A1_	1		MamGypLTR1b	1
LTR16A	1		LTR26C	1		LTR27E	1		LTR40b	1		LTR38A1	1		MamGypsy2-I	1		MER54B	1		MER4E1	1		MER4B	1		MamGypLTR4	1
LTR16A1	1		LTR29	1		LTR31	1		LTR40c	1		LTR40a	1		MamRep605	1		MER57A1	1		MER4-int	1		MER4B-int	1		MamGypsy2-I	1
LTR16B2	1		LTR31	1		LTR32	1		LTR41C	1		LTR40c	1		MER101	1		MER57A-int	1		MER52D	1		MER4D	1		MER101	1
LTR19B	1		LTR33A_	1		LTR33A_	1		LTR42	1		LTR41C	1		MER21-int	1		MER57B2	1		MER54A	1		MER51A	1		MER31B	1
LTR19C	1		LTR37B	1		LTR36	1		LTR43B	1		LTR42	1		MER31B	1		MER57C2	1		MER57A1	1		MER52D	1		MER34A	1
LTR1A2	1		LTR38	1		LTR38	1		LTR45	1		LTR43B	1		MER34A	1		MER57F	1		MER57B1	1		MER54A	1		MER34B	1
LTR22C0	1		LTR38A1	1		LTR40a	1		LTR49-int	1		LTR49-int	1		MER34B	1		MER61B	1		MER57B2	1		MER57A1	1		MER34C_	1
LTR24C	1		LTR3B_	1		LTR40b	1		LTR54B	1		LTR52	1		MER34C_	1		MER65C	1		MER57C2	1		MER57B1	1		MER39	1
LTR26B	1		LTR40a	1		LTR40c	1		LTR56	1		LTR52-int	1		MER39B	1		MER65D	1		MER57D	1		MER57B2	1		MER41G	1
LTR26C	1		LTR40c	1		LTR42	1		LTR57	1		LTR54B	1		MER41G	1		MER66B	1		MER61-int	1		MER61B	1		MER41-int	1
LTR27	1		LTR41C	1		LTR43B	1		LTR65	1		LTR57	1		MER4B	1		MER66C	1		MER65C	1		MER61F	1		MER4A	1
LTR27E	1		LTR42	1		LTR45	1		LTR75	1		LTR5_Hs	1		MER4B-int	1		MER66-int	1		MER65D	1		MER65C	1		MER4A1	1
LTR31	1		LTR43B	1		LTR46	1		LTR79	1		LTR65	1		MER4D0	1		MER67A	1		MER66B	1		MER65D	1		MER4B	1
LTR33A_	1		LTR45	1		LTR49	1		LTR81	1		LTR69	1		MER4D	1		MER68	1		MER66-int	1		MER66A	1		MER4D0	1
LTR33A	1		LTR54B	1		LTR49-int	1		LTR84a	1		LTR75	1		MER4E1	1		MER68B	1		MER67A	1		MER66C	1		MER4D	1
LTR37B	1		LTR57	1		LTR50	1		LTR85c	1		LTR75_1	1		MER4-int	1		MER68-int	1		MER68	1		MER66-int	1		MER4E1	1
LTR38	1		LTR57-int	1		LTR52	1		LTR86A2	1		LTR81	1		MER52D	1		MER72	1		MER68B	1		MER67A	1		MER50	1
LTR38A1	1		LTR65	1		LTR52-int	1		LTR9D	1		LTR86A2	1		MER57A1	1		MER72B	1		MER68-int	1		MER67C	1		MER50B	1
LTR3B_	1		LTR71A	1		LTR55	1		MamGypLTR1a	1		LTR88b	1		MER57C2	1		MER73	1		MER72B	1		MER68B	1		MER51B	1
LTR40a	1		LTR75	1		LTR57	1		MamGypLTR1b	1		LTR88c	1		MER57D	1		MER76	1		MER73	1		MER68-int	1		MER54A	1
LTR40b	1		LTR79	1		LTR65	1		MamGypLTR3	1		LTR89	1		MER57F	1		MER77	1		MER76	1		MER72B	1		MER57A1	1
LTR40c	1		LTR7C	1		LTR75	1		MamGypLTR3a	1		LTR9B	1		MER61B	1		MER77B	1		MER77	1		MER73	1		MER57A-int	1
LTR41	1		LTR81	1		LTR79	1		MamGypLTR4	1		LTR9D	1		MER61F	1		MER83B	1		MER77B	1		MER74B	1		MER57B2	1
LTR41C	1		LTR82B	1		LTR81	1		MamGypsy2-I	1		MamGypLTR2b	1		MER65C	1		MER9a2	1		MER83A-int	1		MER76	1		MER57C2	1
LTR42	1		LTR84a	1		LTR85a	1		MamRep605	1		MamGypLTR2c	1		MER65D	1		MER9a3	1		MLT1C2-int	1		MER77B	1		MER61B	1
LTR43B	1		LTR86A2	1		LTR86A2	1		MER101	1		MamGypLTR3a	1		MER65-int	1		MLT1C2-int	1		MLT1E2	1		MER84-int	1		MER61F	1
LTR45	1		LTR89	1		LTR89	1		MER110A	1		MamGypLTR4	1		MER66B	1		MLT1E2	1		MLT1F2	1		MLT1C2-int	1		MER61-int	1
LTR46	1		LTR9D	1		LTR9B	1		MER11C	1		MamRep605	1		MER66C	1		MLT1F2	1		MLT1J1	1		MLT1F1-int	1		MER65C	1
LTR49-int	1		MamGypLTR1a	1		MamGypLTR2b	1		MER31B	1		MER101	1		MER66-int	1		MLT1J1	1		MLT1J2	1		MLT1G	1		MER65-int	1
LTR54B	1		MamGypLTR2b	1		MamGypLTR3a	1		MER34A	1		MER34A	1		MER67A	1		MLT1J2	1		MLT2A2	1		MLT1G1	1		MER66A	1
LTR57	1		MamGypLTR3a	1		MamGypLTR4	1		MER34B	1		MER34C_	1		MER68	1		MLT1L-int	1		MLT2B1	1		MLT1H1-int	1		MER67A	1
LTR65	1		MamGypLTR4	1		MER101	1		MER34C_	1		MER39	1		MER68B	1		MLT2A2	1		MLT2B4	1		MLT1M	1		MER67C	1
LTR71A	1		MamGypsy2-I	1		MER21-int	1		MER39	1		MER41-int	1		MER68-int	1		MLT2B1	1		MLT2C1	1		MLT2C2	1		MER68B	1
LTR73	1		MER101	1		MER34B	1		MER4B	1		MER4B	1		MER72	1		MLT2B4	1		MLT2C2	1		MLT2F	1		MER68-int	1
LTR75	1		MER21-int	1		MER39	1		MER4D0	1		MER4B-int	1		MER72B	1		MLT2C2	1		MLT2D	1		MSTA1	1		MER70B	1
LTR81	1		MER31B	1		MER41-int	1		MER4D	1		MER4D0	1		MER73	1		MLT2D	1		MLT2E	1		MSTB1	1		MER72B	1
LTR82B	1		MER34	1		MER49	1		MER4E	1		MER4D	1		MER76	1		MLT2E	1		MSTB2	1		MSTB2	1		MER73	1
LTR86A2	1		MER34A	1		MER4B	1		MER4-int	1		MER50B	1		MER77	1		MLT2F	1		MSTC	1		MSTC	1		MER76	1
LTR89	1		MER34B	1		MER4B-int	1		MER50B	1		MER51A	1		MER77B	1		MSTB2	1		PRIMAX-int	1		PABL_A	1		MER77B	1
LTR9D	1		MER34C_	1		MER4D0	1		MER57A1	1		MER52D	1		MER83B	1		MSTC	1		THE1A	1		PRIMA4_LTR	1		MER83	1
MamGypLTR1a	1		MER39	1		MER4D	1		MER57B2	1		MER54B	1		MER9a2	1		THE1A	1		THE1A-int	1		THE1B-int	1		MER83B	1
MamGypLTR2b	1		MER41A	1		MER4E1	1		MER57C2	1		MER57A1	1		MLT1E2	1		THE1A-int	1								MER89	1
MamGypLTR3a	1		MER41-int	1		MER50B	1		MER61B	1		MER57A-int	1		MLT1F2	1		THE1B-int	1								MER9a2	1
MamGypLTR4	1		MER49	1		MER51A	1		MER65C	1		MER57B2	1		MLT1J1	1		THE1C-int	1								MLT1C2-int	1
MamRep605	1		MER4B	1		MER52A	1		MER65D	1		MER57C2	1		MLT1L-int	1											MLT1E2	1
MER101	1		MER4C	1		MER52D	1		MER65-int	1		MER57D	1		MLT2A2	1											MLT1F2	1
MER110A	1		MER4D0	1		MER54B	1		MER66B	1		MER61A	1		MLT2B1	1											MLT1M	1
MER31B	1		MER4E	1		MER57B1	1		MER66C	1		MER61B	1		MLT2B4	1											MLT2A2	1
MER34A	1		MER4-int	1		MER57B2	1		MER67A	1		MER61F	1		MLT2C1	1											MLT2B1	1
MER34B	1		MER50	1		MER57C2	1		MER67C	1		MER65C	1		MLT2C2	1											MLT2C2	1
MER34B-int	1		MER50B	1		MER57F	1		MER68B	1		MER66A	1		MLT2D	1											MLT2D	1
MER34C_	1		MER51B	1		MER61A	1		MER72	1		MER66B	1		MLT2F	1											MLT2F	1
MER34C2	1		MER52D	1		MER61B	1		MER72B	1		MER66C	1		MSTB2	1											MSTB1	1
MER39	1		MER57A1	1		MER61F	1		MER73	1		MER67A	1		MSTB-int	1											MSTB2	1
MER4A1_	1		MER57B2	1		MER61-int	1		MER76	1		MER67C	1		MSTC	1											MSTC	1
MER4B	1		MER57C2	1		MER66C	1		MER77B	1		MER68B	1		PRIMAX-int	1											PABL_A	1
MER4B-int	1		MER61A	1		MER67A	1		MER83B	1		MER68-int	1		THE1B-int	1											PABL_A-int	1
MER4D0	1		MER61B	1		MER67C	1		MER9a2	1		MER70B	1		THE1C-int	1											PRIMA4_LTR	1
MER4D	1		MER65C	1		MER68B	1		MER9a3	1		MER72	1														THE1A	1
MER51A	1		MER66B	1		MER72B	1		MLT1C2-int	1		MER72B	1
MER51B	1		MER66C	1		MER73	1		MLT1E2	1		MER73	1
MER52D	1		MER66-int	1		MER76	1		MLT1L-int	1		MER76	1
MER57A1	1		MER67A	1		MER77B	1		MLT2A1	1		MER77	1
MER57C2	1		MER68B	1		MER83B	1		MLT2A2	1		MER77B	1
MER57D	1		MER68-int	1		MER9a2	1		MLT2B2	1		MER83B	1
MER57F	1		MER72	1		MLT1C2-int	1		MLT2C1	1		MER9a2	1
MER61B	1		MER72B	1		MLT1E1	1		MLT2C2	1		MLT1E1	1
MER61F	1		MER73	1		MLT1F1-int	1		MLT2D	1		MLT1F1-int	1
MER61-int	1		MER76	1		MLT1L-int	1		MLT2F	1		MLT1L-int	1
MER65C	1		MER77B	1		MLT2B1	1		MSTB2	1		MLT2A2	1
MER65-int	1		MER83A-int	1		MLT2C1	1		PRIMAX-int	1		MLT2B1	1
MER66A	1		MER83B	1		MLT2C2	1		THE1B-int	1		MLT2C2	1
MER66B	1		MER9a2	1		MLT2D	1		THE1C-int	1		MLT2D	1
MER66C	1		MER9a3	1		MSTB2	1					MLT2E	1
MER66-int	1		MLT1C2-int	1		PRIMA4_LTR	1					MLT2F	1
MER67A	1		MLT2A1	1		THE1A-int	1					MSTB2	1
MER67C	1		MLT2A2	1		THE1B-int	1					PABL_A	1
MER68B	1		MLT2B1	1								PABL_A-int	1
MER72	1		MLT2B2	1								PRIMA4_LTR	1
MER72B	1		MLT2C1	1								THE1A-int	1
MER73	1		MLT2C2	1								THE1B-int	1
MER74B	1		MLT2D	1
MER76	1		MLT2F	1
MER77B	1		MSTB2	1
MER83	1		PRIMAX-int	1
MER83B	1		THE1A-int	1
MER9a2	1		THE1B-int	1
MER9a3	1		THE1C-int	1
MLT1C2-int	1
MLT1E1	1
MLT1L-int	1
MLT2A1	1
MLT2A2	1
MLT2B1	1
MLT2B2	1
MLT2C1	1
MLT2C2	1
MLT2D	1
MLT2F	1
MSTB2	1
PRIMA4_LTR	1
THE1B-int	1
