# Supplementary material for: LTRs activated by Epstein-Barr virus–induced transformation of B cells alter the transcriptome
Source: HighWire-hosted journal article supplement (doi:10.1101/gr.233585.117), 2018-10-31
Supplement: Supplemental_Table_S3.xlsx [file Supplemental_Table_S3.xlsx]

## Sheet: Supplemental_Table_S3.txt
Chrom	Start	End	LTR	LTR family	Refseq Annotation	Gene symbol (na=not applicable)
chr10	106013952	106027222	MER4A	ERV1	NM_001191003	GSTO1
chr10	1568825	1599179	MSTB1	ERVL-MaLR	NR_033387	ADARB2-AS1
chr1	1337276	1351596	Harlequin-int	ERV1	MSTRG.38.1	na
chr12	10516368	10551105	LTR15	ERV1	NR_120430	LOC101928100
chr12	120928141	120933749	LTR71B	ERV1	NR_038854	NRAV
chr1	31984036	31989846	HERVL-int	ERVL	NR_027085	LINC01226
chr14	19894369	19904572	THE1C	ERVL-MaLR	NR_073459_dup1;NR_073460_dup1	BMS1
chr15	45117945	45174817	HUERS-P1-int	ERV1	NR_146393	SORD2P
chr15	91203465	91208185	MLT1F	ERVL-MaLR	NR_120371	ÊLINC01585
chr16	27458991	27464714	MLT1I	ERVL-MaLR	NR_037158	IL21R-AS1
chr17	18759612	18834599	MLT1K	ERVL-MaLR	NM_001353104;NM_001243936;NM_001353103;NM_001353101;NM_001243942;NM_001353105;NM_001353102;NM_001353098;NM_001353106;NM_001353097	PRPSAP2
chr17	6756895	6803668	MSTB	ERVL-MaLR	NR_002710	ALOX12P2
chr18	77905807	77936315	MER66B	ERV1	NR_028340;NR_028339	PARD6G-AS1
chr21	47720344	47740739	LTR62	ERVL	NM_001286462	C21orf58
chr22	37600277	37616942	THE1C	ERVL-MaLR	MSTRG.10274.1	na
chr3	118227258	118529680	THE1D	ERVL-MaLR	NR_135547	LOC105374060
chr3	127305954	127306019	MLT1K	ERVL-MaLR	NR_107016	MIR7976
chr3	174956354	174991990	THE1B	ERVL-MaLR	MSTRG.11170.2	na
chr4	69916982	69978705	LTR2B	ERV1	NM_001349568	UGT2B7
chr5	27472399	27496508	MER61C	ERV1	NR_038848	LINC01021
chr6	114189179	114194512	MLT1G	ERVL-MaLR	NR_038863	LINC01268
chr6	27729523	27730966	MLT1D	ERVL-MaLR	NR_038929	LOC100131289
chr6	28292515	28324048	HERVL18-int	ERVL	NM_001135215	ZSCAN31
chr7	116752346	116785646	MLT1C	ERVL-MaLR	NR_109981;NR_002331	STZ-AS1
chr7	128577086	128590096	LOR1a	ERV1	NM_001347928	IRF5
chr8	11653082	11696818	LTR12C	ERV1	NM_001287743;NM_001287744;NM_001287742	FDFT1
chr8	2387219	2585991	LTR12E	ERV1	NR_125425;NR_125426	LOC101927815
chr9	66664217	66700453	HERVIP10F-int	ERV1	MSTRG.15026.2	na
chrX	53559057	53743492	MLT1L	ERVL-MaLR	MSTRG.15677.1	na
chrY	2834860	2870667	LTR4	ERV1	NR_144458	ZFY-AS1
