# Supplementary material for: LTRs activated by Epstein-Barr virus–induced transformation of B cells alter the transcriptome
Source: HighWire-hosted journal article supplement (doi:10.1101/gr.233585.117), 2018-10-31
Supplement: Supplemental_Table_S5.xlsx [file Supplemental_Table_S5.xlsx]

## Sheet: Suppl Table S5 - Primers
Primers for RT-PCR analysis
	Primer Name	Sequence	Source
	CSF1R -5090 -F	TTTTGCTACTGGCTTCATTGA	Lamprecht et al, 2010.
	CSF1R +148 -R	CATTCCACGCTGCCATTG
	CSF1R canonical-F	AGTTCTGCTGCTCCTGCTG	This paper
	CSF1R canonical-R	CTCAGGGACACTGGGCTCTA
	IRF5 noncanonical-F	AGAGAAGGCGATGCTGAAAA	This paper
	IRF5 noncanonical-R	TCCAGGGGATGCAGAATAAT
	IRF5 canonical -F	GGTCAACGGGGAAAAGAAAT	This paper
	IRF5 canonical-R	GCTCTTGTTAAGGGCACAGC
	chimeric HUWE1 -F	CACACTGCTCCAACAGCTTC	This paper
	chimeric HUWE1 -R	CTTTACCCGCCTACCTCCAT
Primers for PCR
			Source
	HERVS71	TGGCATTCTCTCTATGACTTGC	This paper
		CAAGCCCTTGAACTCCACAT
	LTR8	GCTGGAGGGAGTCTACCAAA	This paper
		CTGGGGCAAAGTCTAATGGA
Primers for qPCR
			Source
	chimeric HUWE1 - F	GTAGCCCTGAGGAATCCTGT	This paper
	chimeric HUWE1 - R	CTTTACCCGCCTACCTCCAT
	chimeric NCF2 -F	TGGTAGTAGAGCATCCCTCGTT	This paper
	chimeric NCF2 -R	TTACCAGAAGCATTAACCGAGA
	RUNX3	AGCACGTCCACCATCGAG	This paper
	RUNX3	GCAAGATGGGCGAGAACAG
	LINC01055	GCCTTCTCTGTGCAGTGTGT	This paper
	LINC01055	AAAGGTGGCGTGAGTTGATT
	chimeric SORD2P -F	CCTTGTGTCCCAGGGTAACT	This paper
	chimeric SORD2P - R	GCCCTGATTGATCCACTTTC
	LINC02363	TTGGATGGAGGATGAGGAAT	This paper
	LINC02363	GATCCAGGCCTCCTGTGTAT
